# Supplementary material for: Understanding the transmission dynamics of Escherichia coli O157:H7 super-shedding infections in feedlot cattle
Source: PeerJ. 2021 Dec 20;9:e12524. doi: 10.7717/peerj.12524 (PMC8697766; doi:10.7717/peerj.12524)
Supplement: Supplemental Information 1 [file peerj-09-12524-s001.xls]

## Sheet: Master
Sample ID	Location	Lot/Pen	Processing Date	E. coli O157 Presence/ Absence	E. coli O157 MPN
W1	Williams		2011-09-13	1	23
W2	Williams		2011-09-13	1	20
W3	Williams		2011-09-13	1	13
W4	Williams		2011-09-13	0	ND
W5	Williams		2011-09-13	0	ND
W6	Williams		2011-09-13	1	23
W7	Williams		2011-09-13	1	6.1
W8	Williams		2011-09-13	1	23
W9	Williams		2011-09-13	1	700
W10	Williams		2011-09-13	0	ND
W11	Williams		2011-09-13	0	ND
W12	Williams		2011-09-13	0	ND
W13	Williams		2011-09-13	1	23
W14	Williams		2011-09-13	0	ND
W15	Williams		2011-09-13	1	2.3
W16	Williams		2011-09-13	1	6.1
W17	Williams		2011-09-13	1	23
W18	Williams		2011-09-13	0	ND
W19	Williams		2011-09-13	1	12
A1	Texas	A	2011-09-27	1	430
A2	Texas	A	2011-09-27	0	ND
A3	Texas	A	2011-09-27	0	ND
A4	Texas	A	2011-09-27	0	ND
A5	Texas	A	2011-09-27	0	ND
A6	Texas	A	2011-09-27	0	ND
A7	Texas	A	2011-09-27	0	ND
A8	Texas	A	2011-09-27	0	ND
A9	Texas	A	2011-09-27	1	43
A10	Texas	A	2011-09-27	0	ND
A11	Texas	A	2011-09-27	0	ND
A12	Texas	A	2011-09-27	0	ND
A13	Texas	A	2011-09-27	0	ND
A14	Texas	A	2011-09-27	0	ND
A15	Texas	A	2011-09-27	0	ND
A16	Texas	A	2011-09-27	0	ND
A17	Texas	A	2011-09-27	1	11
A18	Texas	A	2011-09-27	0	ND
A19	Texas	A	2011-09-27	1	2.3
A20	Texas	A	2011-09-27	0	ND
A21	Texas	A	2011-09-27	0	ND
A22	Texas	A	2011-09-27	0	ND
A23	Texas	A	2011-09-27	0	ND
A24	Texas	A	2011-09-27	0	ND
A25	Texas	A	2011-09-27	0	ND
A26	Texas	A	2011-09-27	0	ND
A27	Texas	A	2011-09-27	0	ND
A28	Texas	A	2011-09-27	0	ND
A29	Texas	A	2011-09-27	0	ND
A30	Texas	A	2011-09-27	0	ND
A31	Texas	A	2011-09-27	0	ND
A32	Texas	A	2011-09-27	0	ND
A33	Texas	A	2011-09-27	0	ND
A34	Texas	A	2011-09-27	0	ND
A35	Texas	A	2011-09-27	0	ND
A36	Texas	A	2011-09-27	0	ND
A37	Texas	A	2011-09-27	0	ND
A38	Texas	A	2011-09-27	0	ND
A39	Texas	A	2011-09-27	0	ND
A40	Texas	A	2011-09-27	0	ND
B1	Texas	B	2011-10-04	0	ND
B2	Texas	B	2011-10-04	0	ND
B3	Texas	B	2011-10-04	1	0.036
B4	Texas	B	2011-10-04	0	ND
B5	Texas	B	2011-10-04	0	ND
B6	Texas	B	2011-10-04	1	0.072
B7	Texas	B	2011-10-04	1	11
B8	Texas	B	2011-10-04	1	0.036
B9	Texas	B	2011-10-04	0	ND
B10	Texas	B	2011-10-04	0	ND
B11	Texas	B	2011-10-04	0	ND
B12	Texas	B	2011-10-04	0	ND
B13	Texas	B	2011-10-04	1	4.2
B14	Texas	B	2011-10-04	1	7.4
B15	Texas	B	2011-10-04	1	23
B16	Texas	B	2011-10-04	0	ND
B17	Texas	B	2011-10-04	1	9.2
B18	Texas	B	2011-10-04	1	0.036
B19	Texas	B	2011-10-04	1	4.2
B20	Texas	B	2011-10-04	0	ND
B21	Texas	B	2011-10-04	0	ND
B22	Texas	B	2011-10-04	0	ND
B23	Texas	B	2011-10-04	0	ND
B24	Texas	B	2011-10-04	0	ND
B25	Texas	B	2011-10-04	0	ND
B26	Texas	B	2011-10-04	0	ND
B27	Texas	B	2011-10-04	0	ND
B28	Texas	B	2011-10-04	0	ND
B29	Texas	B	2011-10-04	0	ND
B30	Texas	B	2011-10-04	0	ND
B31	Texas	B	2011-10-04	0	ND
B32	Texas	B	2011-10-04	0	ND
B33	Texas	B	2011-10-04	0	ND
B34	Texas	B	2011-10-04	1	11
B35	Texas	B	2011-10-04	0	ND
B36	Texas	B	2011-10-04	0	ND
B37	Texas	B	2011-10-04	0	ND
B38	Texas	B	2011-10-04	1	0.036
B39	Texas	B	2011-10-04	0	ND
B40	Texas	B	2011-10-04	0	ND
A41	Texas	A	2011-10-19	1	4.2
A42	Texas	A	2011-10-19	0	ND
A43	Texas	A	2011-10-19	0	ND
A44	Texas	A	2011-10-19	0	ND
A45	Texas	A	2011-10-19	0	ND
A46	Texas	A	2011-10-19	0	ND
A47	Texas	A	2011-10-19	0	ND
A48	Texas	A	2011-10-19	0	ND
A49	Texas	A	2011-10-19	1	150
A50	Texas	A	2011-10-19	0	ND
A51	Texas	A	2011-10-19	0	ND
A52	Texas	A	2011-10-19	0	ND
A53	Texas	A	2011-10-19	1	0.036
A54	Texas	A	2011-10-19	0	ND
A55	Texas	A	2011-10-19	0	ND
A56	Texas	A	2011-10-19	0	ND
A57	Texas	A	2011-10-19	0	ND
A58	Texas	A	2011-10-19	0	ND
A59	Texas	A	2011-10-19	1	0.036
A60	Texas	A	2011-10-19	0	ND
A61	Texas	A	2011-10-19	0	ND
A62	Texas	A	2011-10-19	0	ND
A63	Texas	A	2011-10-19	0	ND
A64	Texas	A	2011-10-19	0	ND
A65	Texas	A	2011-10-19	0	ND
A66	Texas	A	2011-10-19	0	ND
A67	Texas	A	2011-10-19	0	ND
A68	Texas	A	2011-10-19	0	ND
A69	Texas	A	2011-10-19	0	ND
A70	Texas	A	2011-10-19	0	ND
A71	Texas	A	2011-10-19	1	2.8
A72	Texas	A	2011-10-19	0	ND
A73	Texas	A	2011-10-19	0	ND
A74	Texas	A	2011-10-19	0	ND
A75	Texas	A	2011-10-19	0	ND
A76	Texas	A	2011-10-19	0	ND
A77	Texas	A	2011-10-19	0	ND
A78	Texas	A	2011-10-19	0	ND
A79	Texas	A	2011-10-19	0	ND
A80	Texas	A	2011-10-19	1	0.73
B41	Texas	B	2011-10-25	1	2.3
B42	Texas	B	2011-10-25	0	ND
B43	Texas	B	2011-10-25	1	0.92
B44	Texas	B	2011-10-25	0	ND
B45	Texas	B	2011-10-25	1	0.036
B46	Texas	B	2011-10-25	0	ND
B47	Texas	B	2011-10-25	1	240
B48	Texas	B	2011-10-25	0	ND
B49	Texas	B	2011-10-25	0	ND
B50	Texas	B	2011-10-25	0	ND
B51	Texas	B	2011-10-25	0	ND
B52	Texas	B	2011-10-25	1	0.73
B53	Texas	B	2011-10-25	0	ND
B54	Texas	B	2011-10-25	0	ND
B55	Texas	B	2011-10-25	1	0.036
B56	Texas	B	2011-10-25	0	ND
B57	Texas	B	2011-10-25	0	ND
B58	Texas	B	2011-10-25	0	ND
B59	Texas	B	2011-10-25	1	0.61
B60	Texas	B	2011-10-25	0	ND
B61	Texas	B	2011-10-25	1	7.4
B62	Texas	B	2011-10-25	0	ND
B63	Texas	B	2011-10-25	0	ND
B64	Texas	B	2011-10-25	0	ND
B65	Texas	B	2011-10-25	Cracked, Not Processed
B66	Texas	B	2011-10-25	0	ND
B67	Texas	B	2011-10-25	1	0.036
B68	Texas	B	2011-10-25	0	ND
B69	Texas	B	2011-10-25	0	ND
B70	Texas	B	2011-10-25	1	0.036
B71	Texas	B	2011-10-25	0	ND
B72	Texas	B	2011-10-25	0	ND
B73	Texas	B	2011-10-25	0	ND
B74	Texas	B	2011-10-25	0	ND
B75	Texas	B	2011-10-25	0	ND
B76	Texas	B	2011-10-25	0	ND
B77	Texas	B	2011-10-25	0	ND
B78	Texas	B	2011-10-25	0	ND
B79	Texas	B	2011-10-25	1	0.3
B80	Texas	B	2011-10-25	1	3.8
A1	Williams		2011-10-27	0	ND
A2	Williams		2011-10-27	0	ND
A3	Williams		2011-10-27	1	240
A4	Williams		2011-10-27	0	ND
A5	Williams		2011-10-27	1	2.8
A6	Williams		2011-10-27	0	ND
A7	Williams		2011-10-27	1	0.3
A8	Williams		2011-10-27	1	0.3
A9	Williams		2011-10-27	0	ND
A10	Williams		2011-10-27	0	ND
A11	Williams		2011-10-27	0	ND
A12	Williams		2011-10-27	0	ND
A13	Williams		2011-10-27	0	ND
A14	Williams		2011-10-27	0	ND
A15	Williams		2011-10-27	0	ND
A16	Williams		2011-10-27	0	ND
A17	Williams		2011-10-27	0	ND
A18	Williams		2011-10-27	0	ND
A19	Williams		2011-10-27	1	0.23
A20	Williams		2011-10-27	0	ND
A21	Williams		2011-10-27	0	ND
B1	Williams		2011-10-27	0	ND
B2	Williams		2011-10-27	1	7.4
B3	Williams		2011-10-27	0	ND
B4	Williams		2011-10-27	0	ND
B5	Williams		2011-10-27	1	150
B6	Williams		2011-10-27	1	0.62
B7	Williams		2011-10-27	0	ND
B8	Williams		2011-10-27	0	ND
B9	Williams		2011-10-27	0	ND
B10	Williams		2011-10-27	0	ND
B11	Williams		2011-10-27	0	ND
B12	Williams		2011-10-27	1	2
B13	Williams		2011-10-27	0	ND
B14	Williams		2011-10-27	1	0.036
B15	Williams		2011-10-27	1	0.036
B16	Williams		2011-10-27	1	0.61
B17	Williams		2011-10-27	1	1.6
B18	Williams		2011-10-27	0	ND
B19	Williams		2011-10-27	1	0.23
B20	Williams		2011-10-27	0	ND
B21	Williams		2011-10-27	1	0.092
IV1	Imperial Valley		2011-11-03	1	0.73
IV2	Imperial Valley		2011-11-03	0	ND
IV3	Imperial Valley		2011-11-03	1	920
IV4	Imperial Valley		2011-11-03	1	0.92
IV5	Imperial Valley		2011-11-03	1	15
IV6	Imperial Valley		2011-11-03	1	150
IV7	Imperial Valley		2011-11-03	1	240
IV8	Imperial Valley		2011-11-03	1	2300
IV9	Imperial Valley		2011-11-03	1	7
IV10	Imperial Valley		2011-11-03	1	2.1
IV11	Imperial Valley		2011-11-03	1	210
IV12	Imperial Valley		2011-11-03	1	3.7
IV13	Imperial Valley		2011-11-03	1	1.1
IV14	Imperial Valley		2011-11-03	1	43
IV15	Imperial Valley		2011-11-03	1	4.4
IV16	Imperial Valley		2011-11-03	1	430
IV17	Imperial Valley		2011-11-03	1	280
IV18	Imperial Valley		2011-11-03	0	ND
IV19	Imperial Valley		2011-11-03	1	7500
IV20	Imperial Valley		2011-11-03	1	210
IV21	Imperial Valley		2011-11-03	1	0.73
IV22	Imperial Valley		2011-11-03	1	2.1
IV23	Imperial Valley		2011-11-03	0	ND
IV24	Imperial Valley		2011-11-03	1	9.2
IV25	Imperial Valley		2011-11-03	1	15
IV26	Imperial Valley		2011-11-03	1	4.2
IV27	Imperial Valley		2011-11-03	1	23
IV28	Imperial Valley		2011-11-03	1	9.2
IV29	Imperial Valley		2011-11-03	1	9.2
IV30	Imperial Valley		2011-11-03	1	1.1
IV31	Imperial Valley		2011-11-03	0	ND
IV32	Imperial Valley		2011-11-03	0	ND
IV33	Imperial Valley		2011-11-03	1	430
IV34	Imperial Valley		2011-11-03	1	4.2
IV35	Imperial Valley		2011-11-03	1	1.4
IV36	Imperial Valley		2011-11-03	1	430
IV37	Imperial Valley		2011-11-03	1	2.8
IV38	Imperial Valley		2011-11-03	1	43
IV39	Imperial Valley		2011-11-03	0	ND
IV40	Imperial Valley		2011-11-03	0	ND
A81	Texas	A	2011-11-08	0	ND
A82	Texas	A	2011-11-08	0	ND
A83	Texas	A	2011-11-08	0	ND
A84	Texas	A	2011-11-08	0	ND
A85	Texas	A	2011-11-08	0	ND
A86	Texas	A	2011-11-08	0	ND
A87	Texas	A	2011-11-08	0	ND
A88	Texas	A	2011-11-08	0	ND
A89	Texas	A	2011-11-08	0	ND
A90	Texas	A	2011-11-08	0	ND
A91	Texas	A	2011-11-08	0	ND
A92	Texas	A	2011-11-08	0	ND
A93	Texas	A	2011-11-08	0	ND
A94	Texas	A	2011-11-08	0	ND
A95	Texas	A	2011-11-08	0	ND
A96	Texas	A	2011-11-08	0	ND
A97	Texas	A	2011-11-08	0	ND
A98	Texas	A	2011-11-08	0	ND
A99	Texas	A	2011-11-08	0	ND
A100	Texas	A	2011-11-08	0	ND
A101	Texas	A	2011-11-08	1	4.2
A102	Texas	A	2011-11-08	0	ND
A103	Texas	A	2011-11-08	0	ND
A104	Texas	A	2011-11-08	0	ND
A105	Texas	A	2011-11-08	1	0.23
A106	Texas	A	2011-11-08	0	ND
A107	Texas	A	2011-11-08	0	ND
A108	Texas	A	2011-11-08	0	ND
A109	Texas	A	2011-11-08	0	ND
A110	Texas	A	2011-11-08	0	ND
A111	Texas	A	2011-11-08	0	ND
A112	Texas	A	2011-11-08	0	ND
A113	Texas	A	2011-11-08	0	ND
A114	Texas	A	2011-11-08	0	ND
A115	Texas	A	2011-11-08	1	0.036
A116	Texas	A	2011-11-08	0	ND
A117	Texas	A	2011-11-08	0	ND
A118	Texas	A	2011-11-08	0	ND
A119	Texas	A	2011-11-08	0	ND
A120	Texas	A	2011-11-08	0	ND
B81	Texas	B	2011-11-15	0	ND
B82	Texas	B	2011-11-15	1	2.3
B83	Texas	B	2011-11-15	1	0.36
B84	Texas	B	2011-11-15	1	0.3
B85	Texas	B	2011-11-15	0	ND
B86	Texas	B	2011-11-15	0	ND
B87	Texas	B	2011-11-15	1	9.2
B88	Texas	B	2011-11-15	1	15
B89	Texas	B	2011-11-15	1	2.3
B90	Texas	B	2011-11-15	0	ND
B91	Texas	B	2011-11-15	0	ND
B92	Texas	B	2011-11-15	1	0.036
B93	Texas	B	2011-11-15	0	ND
B94	Texas	B	2011-11-15	0	ND
B95	Texas	B	2011-11-15	0	ND
B96	Texas	B	2011-11-15	0	ND
B97	Texas	B	2011-11-15	1	4.2
B98	Texas	B	2011-11-15	0	ND
B99	Texas	B	2011-11-15	1	0.15
B100	Texas	B	2011-11-15	1	7.4
B101	Texas	B	2011-11-15	0	ND
B102	Texas	B	2011-11-15	0	ND
B103	Texas	B	2011-11-15	0	ND
B104	Texas	B	2011-11-15	0	ND
B105	Texas	B	2011-11-15	1	0.36
B106	Texas	B	2011-11-15	0	ND
B107	Texas	B	2011-11-15	0	ND
B108	Texas	B	2011-11-15	0	ND
B109	Texas	B	2011-11-15	0	ND
B110	Texas	B	2011-11-15	1	0.036
B111	Texas	B	2011-11-15	1	0.36
B112	Texas	B	2011-11-15	0	ND
B113	Texas	B	2011-11-15	1	0.036
B114	Texas	B	2011-11-15	1	0.036
B115	Texas	B	2011-11-15	0	ND
B116	Texas	B	2011-11-15	0	ND
B117	Texas	B	2011-11-15	0	ND
B118	Texas	B	2011-11-15	0	ND
B119	Texas	B	2011-11-15	1	4.2
B120	Texas	B	2011-11-15	0	ND
A121	Texas	A	2011-12-06	0	ND
A122	Texas	A	2011-12-06	0	ND
A123	Texas	A	2011-12-06	0	ND
A124	Texas	A	2011-12-06	0	ND
A125	Texas	A	2011-12-06	0	ND
A126	Texas	A	2011-12-06	0	ND
A127	Texas	A	2011-12-06	0	ND
A128	Texas	A	2011-12-06	0	ND
A129	Texas	A	2011-12-06	0	ND
A130	Texas	A	2011-12-06	0	ND
A131	Texas	A	2011-12-06	Cracked, Not Processed
A132	Texas	A	2011-12-06	Cracked, Not Processed
A133	Texas	A	2011-12-06	0	ND
A134	Texas	A	2011-12-06	0	ND
A135	Texas	A	2011-12-06	0	ND
A136	Texas	A	2011-12-06	0	ND
A137	Texas	A	2011-12-06	0	ND
A138	Texas	A	2011-12-06	0	ND
A139	Texas	A	2011-12-06	0	ND
A140	Texas	A	2011-12-06	0	ND
A141	Texas	A	2011-12-06	0	ND
A142	Texas	A	2011-12-06	0	ND
A143	Texas	A	2011-12-06	Cracked, Not Processed
A144	Texas	A	2011-12-06	0	ND
A145	Texas	A	2011-12-06	Cracked, Not Processed
A146	Texas	A	2011-12-06	0	ND
A147	Texas	A	2011-12-06	0	ND
A148	Texas	A	2011-12-06	0	ND
A149	Texas	A	2011-12-06	0	ND
A150	Texas	A	2011-12-06	0	ND
A150	Texas	A	2011-12-06	0	ND
A151	Texas	A	2011-12-06	0	ND
A152	Texas	A	2011-12-06	0	ND
A153	Texas	A	2011-12-06	0	ND
A154	Texas	A	2011-12-06	0	ND
A155	Texas	A	2011-12-06	0	ND
A156	Texas	A	2011-12-06	0	ND
A157	Texas	A	2011-12-06	0	ND
A158	Texas	A	2011-12-06	Cracked, Not Processed
A159	Texas	A	2011-12-06	0	ND
A160	Texas	A	2011-12-06	0	ND
B121	Texas	B	2011-12-06	1	2.6
B122	Texas	B	2011-12-06	1	0.036
B123	Texas	B	2011-12-06	0	ND
B124	Texas	B	2011-12-06	0	ND
B125	Texas	B	2011-12-06	1	0.036
B126	Texas	B	2011-12-06	0	ND
B127	Texas	B	2011-12-06
B128	Texas	B	2011-12-06	Cracked, Not Processed
B129	Texas	B	2011-12-06	0	ND
B130	Texas	B	2011-12-06	0	ND
B131	Texas	B	2011-12-06	1	0.092
B132	Texas	B	2011-12-06	1	0.092
B133	Texas	B	2011-12-06	1	0.073
B134	Texas	B	2011-12-06	0	ND
B135	Texas	B	2011-12-06	0	ND
B136	Texas	B	2011-12-06	0	ND
B137	Texas	B	2011-12-06	1	0.15
B138	Texas	B	2011-12-06	1	0.036
B139	Texas	B	2011-12-06	0	ND
B140	Texas	B	2011-12-06	1	4.2
B141	Texas	B	2011-12-06	0	ND
B142	Texas	B	2011-12-06	0	ND
B143	Texas	B	2011-12-06	0	ND
B144	Texas	B	2011-12-06	Cracked, Not Processed
B145	Texas	B	2011-12-06	0	ND
B146	Texas	B	2011-12-06	0	ND
B147	Texas	B	2011-12-06	0	ND
B148	Texas	B	2011-12-06	0	ND
B149	Texas	B	2011-12-06	0	ND
B150	Texas	B	2011-12-06	0	ND
B151	Texas	B	2011-12-06	0	ND
B152	Texas	B	2011-12-06	0	ND
B153	Texas	B	2011-12-06	0	ND
B154	Texas	B	2011-12-06	0	ND
B155	Texas	B	2011-12-06	0	ND
B156	Texas	B	2011-12-06	0	ND
B157	Texas	B	2011-12-06	0	ND
B158	Texas	B	2011-12-06	Cracked, Not Processed
B159	Texas	B	2011-12-06	0	ND
B160	Texas	B	2011-12-06	0	ND
A1	Imperial Valley	Lot#476, Pen 20 & 21	2011-12-13	0	ND
A2	Imperial Valley	Lot#476, Pen 20 & 21	2011-12-13	1	0.62
A3	Imperial Valley	Lot#476, Pen 20 & 21	2011-12-13	0	ND
A4	Imperial Valley	Lot#476, Pen 20 & 21	2011-12-13	1	2
A5	Imperial Valley	Lot#476, Pen 20 & 21	2011-12-13	0	ND
A6	Imperial Valley	Lot#476, Pen 20 & 21	2011-12-13	0	ND
A7	Imperial Valley	Lot#476, Pen 20 & 21	2011-12-13	0	ND
A8	Imperial Valley	Lot#476, Pen 20 & 21	2011-12-13	1	0.2
A9	Imperial Valley	Lot#476, Pen 20 & 21	2011-12-13	0	ND
A10	Imperial Valley	Lot#476, Pen 20 & 21	2011-12-13	1	23
A11	Imperial Valley	Lot#476, Pen 20 & 21	2011-12-13	0	ND
A12	Imperial Valley	Lot#476, Pen 20 & 21	2011-12-13	1	28
A13	Imperial Valley	Lot#476, Pen 20 & 21	2011-12-13	0	ND
A14	Imperial Valley	Lot#476, Pen 20 & 21	2011-12-13	1	0.15
A15	Imperial Valley	Lot#476, Pen 20 & 21	2011-12-13	0	ND
A16	Imperial Valley	Lot#476, Pen 20 & 21	2011-12-13	1	0.36
A17	Imperial Valley	Lot#476, Pen 20 & 21	2011-12-13	1	460
A18	Imperial Valley	Lot#476, Pen 20 & 21	2011-12-13	1	0.63
A19	Imperial Valley	Lot#476, Pen 20 & 21	2011-12-13	1	0.92
B1	Imperial Valley	Lot#487, Pen 53 & 54	2011-12-13	1	93
B2	Imperial Valley	Lot#487, Pen 53 & 54	2011-12-13	0	ND
B3	Imperial Valley	Lot#487, Pen 53 & 54	2011-12-13	1	0.11
B4	Imperial Valley	Lot#487, Pen 53 & 54	2011-12-13	0	ND
B5	Imperial Valley	Lot#487, Pen 53 & 54	2011-12-13	0	ND
B6	Imperial Valley	Lot#487, Pen 53 & 54	2011-12-13	1	1.5
B7	Imperial Valley	Lot#487, Pen 53 & 54	2011-12-13	0	ND
B8	Imperial Valley	Lot#487, Pen 53 & 54	2011-12-13	1	0.036
B9	Imperial Valley	Lot#487, Pen 53 & 54	2011-12-13	1	150
B10	Imperial Valley	Lot#487, Pen 53 & 54	2011-12-13	1	2.4
B11	Imperial Valley	Lot#487, Pen 53 & 54	2011-12-13	0	ND
B12	Imperial Valley	Lot#487, Pen 53 & 54	2011-12-13	0	ND
B13	Imperial Valley	Lot#487, Pen 53 & 54	2011-12-13	1	1.5
B14	Imperial Valley	Lot#487, Pen 53 & 54	2011-12-13	0	ND
B15	Imperial Valley	Lot#487, Pen 53 & 54	2011-12-13	1	430
B16	Imperial Valley	Lot#487, Pen 53 & 54	2011-12-13	0	ND
B17	Imperial Valley	Lot#487, Pen 53 & 54	2011-12-13	0	ND
B18	Imperial Valley	Lot#487, Pen 53 & 54	2011-12-13	0	ND
B19	Imperial Valley	Lot#487, Pen 53 & 54	2011-12-13	1	0.036
B20	Imperial Valley	Lot#487, Pen 53 & 54	2011-12-13	1	15
C1	Williams	A	2011-12-13	1	1.1
C2	Williams	A	2011-12-13	0	ND
C3	Williams	A	2011-12-13	1	0.74
C4	Williams	A	2011-12-13	1	0.33
C5	Williams	A	2011-12-13	1	23000
C6	Williams	A	2011-12-13	1	24
C7	Williams	A	2011-12-13	1	0.36
C8	Williams	A	2011-12-13	1	2300
C9	Williams	A	2011-12-13	0	ND
C10	Williams	A	2011-12-13	1	0.092
C11	Williams	A	2011-12-13	1	6.1
C12	Williams	A	2011-12-13	1	3.6
C13	Williams	A	2011-12-13	0	ND
C14	Williams	A	2011-12-13	0	ND
C15	Williams	A	2011-12-13	1	1.1
C16	Williams	A	2011-12-13	1	4.4
C17	Williams	A	2011-12-13	1	2300
C18	Williams	A	2011-12-13	0	ND
C19	Williams	A	2011-12-13	0	ND
C20	Williams	A	2011-12-13	0	ND
D1	Williams	B	2011-12-13	0	ND
D2	Williams	B	2011-12-13	0	ND
D3	Williams	B	2011-12-13	0	ND
D4	Williams	B	2011-12-13	0	ND
D5	Williams	B	2011-12-13	0	ND
D6	Williams	B	2011-12-13	0	ND
D7	Williams	B	2011-12-13	0	ND
D8	Williams	B	2011-12-13	0	ND
D9	Williams	B	2011-12-13	0	ND
D10	Williams	B	2011-12-13	0	ND
D11	Williams	B	2011-12-13	0	ND
D12	Williams	B	2011-12-13	0	ND
D13	Williams	B	2011-12-13	0	ND
D14	Williams	B	2011-12-13	0	ND
D15	Williams	B	2011-12-13	0	ND
D16	Williams	B	2011-12-13	0	ND
D17	Williams	B	2011-12-13	0	ND
D18	Williams	B	2011-12-13	0	ND
D19	Williams	B	2011-12-13	0	ND
D20	Williams	B	2011-12-13	0	ND
IV1	Imperial Valley	Lot#476, Pen 20 & 21	2012-01-18	0	ND
IV2	Imperial Valley	Lot#476, Pen 20 & 21	2012-01-18	0	ND
IV3	Imperial Valley	Lot#476, Pen 20 & 21	2012-01-18	0	ND
IV4	Imperial Valley	Lot#476, Pen 20 & 21	2012-01-18	0	ND
IV5	Imperial Valley	Lot#476, Pen 20 & 21	2012-01-18	0	ND
IV6	Imperial Valley	Lot#476, Pen 20 & 21	2012-01-18	1	0.15
IV7	Imperial Valley	Lot#476, Pen 20 & 21	2012-01-18	0	ND
IV8	Imperial Valley	Lot#476, Pen 20 & 21	2012-01-18	0	ND
IV9	Imperial Valley	Lot#476, Pen 20 & 21	2012-01-18	0	ND
IV10	Imperial Valley	Lot#476, Pen 20 & 21	2012-01-18	0	ND
IV11	Imperial Valley	Lot#476, Pen 20 & 21	2012-01-18	1	0.96
IV12	Imperial Valley	Lot#476, Pen 20 & 21	2012-01-18	0	ND
IV13	Imperial Valley	Lot#476, Pen 20 & 21	2012-01-18	0	ND
IV14	Imperial Valley	Lot#476, Pen 20 & 21	2012-01-18	1	21000
IV15	Imperial Valley	Lot#476, Pen 20 & 21	2012-01-18	1	0.036
IV16	Imperial Valley	Lot#476, Pen 20 & 21	2012-01-18	1	0.072
IV17	Imperial Valley	Lot#476, Pen 20 & 21	2012-01-18	0	ND
IV18	Imperial Valley	Lot#476, Pen 20 & 21	2012-01-18	0	ND
IV19	Imperial Valley	Lot#476, Pen 20 & 21	2012-01-18	1	0.15
IV20	Imperial Valley	Lot#476, Pen 20 & 21	2012-01-18	0	ND
IV21	Imperial Valley	Pen 39 & 40	2012-01-18	0	ND
IV22	Imperial Valley	Pen 39 & 40	2012-01-18	0	ND
IV23	Imperial Valley	Pen 39 & 40	2012-01-18	0	ND
IV24	Imperial Valley	Pen 39 & 40	2012-01-18	0	ND
IV25	Imperial Valley	Pen 39 & 40	2012-01-18	0	ND
IV26	Imperial Valley	Pen 39 & 40	2012-01-18	0	ND
IV27	Imperial Valley	Pen 39 & 40	2012-01-18	0	ND
IV28	Imperial Valley	Pen 39 & 40	2012-01-18	0	ND
IV29	Imperial Valley	Pen 39 & 40	2012-01-18	0	ND
IV30	Imperial Valley	Pen 39 & 40	2012-01-18	0	ND
IV31	Imperial Valley	Pen 39 & 40	2012-01-18	0	ND
IV32	Imperial Valley	Pen 39 & 40	2012-01-18	0	ND
IV33	Imperial Valley	Pen 39 & 40	2012-01-18	0	ND
IV34	Imperial Valley	Pen 39 & 40	2012-01-18	0	ND
IV35	Imperial Valley	Pen 39 & 40	2012-01-18	0	ND
IV36	Imperial Valley	Pen 39 & 40	2012-01-18	0	ND
IV37	Imperial Valley	Pen 39 & 40	2012-01-18	0	ND
IV38	Imperial Valley	Pen 39 & 40	2012-01-18	0	ND
IV39	Imperial Valley	Pen 39 & 40	2012-01-18	0	ND
IV40	Imperial Valley	Pen 39 & 40	2012-01-18	0	ND
W1	Williams	A	2012-01-18	0	ND
W2	Williams	A	2012-01-18	0	ND
W3	Williams	A	2012-01-18	0	ND
W4	Williams	A	2012-01-18	0	ND
W5	Williams	A	2012-01-18	0	ND
W6	Williams	A	2012-01-18	0	ND
W7	Williams	A	2012-01-18	0	ND
W8	Williams	A	2012-01-18	0	ND
W9	Williams	A	2012-01-18	0	ND
W10	Williams	A	2012-01-18	0	ND
W11	Williams	A	2012-01-18	0	ND
W12	Williams	A	2012-01-18	0	ND
W13	Williams	A	2012-01-18	0	ND
W14	Williams	A	2012-01-18	0	ND
W15	Williams	A	2012-01-18	0	ND
W16	Williams	A	2012-01-18	0	ND
W17	Williams	A	2012-01-18	0	ND
W18	Williams	A	2012-01-18	0	ND
W19	Williams	A	2012-01-18	0	ND
W20	Williams	B	2012-01-18	0	ND
W21	Williams	B	2012-01-18	0	ND
W22	Williams	B	2012-01-18	0	ND
W23	Williams	B	2012-01-18	0	ND
W24	Williams	B	2012-01-18	0	ND
W25	Williams	B	2012-01-18	0	ND
W26	Williams	B	2012-01-18	0	ND
W27	Williams	B	2012-01-18	0	ND
W28	Williams	B	2012-01-18	0	ND
W29	Williams	B	2012-01-18	0	ND
W30	Williams	B	2012-01-18	0	ND
W31	Williams	B	2012-01-18	0	ND
W32	Williams	B	2012-01-18	0	ND
W33	Williams	B	2012-01-18	0	ND
W34	Williams	B	2012-01-18	0	ND
W35	Williams	B	2012-01-18	0	ND
W36	Williams	B	2012-01-18	0	ND
W37	Williams	B	2012-01-18	0	ND
W38	Williams	B	2012-01-18	0	ND
W39	Williams	B	2012-01-18	0	ND
W40	Williams	B	2012-01-18	0	ND
142	Williams	A	2012-02-14	0	ND
143	Williams	A	2012-02-14	0	ND
144	Williams	A	2012-02-14	0	ND
145	Williams	A	2012-02-14	0	ND
146	Williams	A	2012-02-14	0	ND
147	Williams	A	2012-02-14	0	ND
148	Williams	A	2012-02-14	0	ND
149	Williams	A	2012-02-14	0	ND
150	Williams	A	2012-02-14	0	ND
151	Williams	A	2012-02-14	0	ND
152	Williams	A	2012-02-14	0	ND
153	Williams	A	2012-02-14	1	9.2
154	Williams	A	2012-02-14	0	ND
155	Williams	A	2012-02-14	0	ND
156	Williams	A	2012-02-14	0	ND
157	Williams	A	2012-02-14	0	ND
158	Williams	A	2012-02-14	0	ND
159	Williams	A	2012-02-14	0	ND
160	Williams	A	2012-02-14	0	ND
161	Williams	A	2012-02-14	0	ND
162	Williams	B	2012-02-14	0	ND
163	Williams	B	2012-02-14	0	ND
164	Williams	B	2012-02-14	0	ND
165	Williams	B	2012-02-14	0	ND
166	Williams	B	2012-02-14	0	ND
167	Williams	B	2012-02-14	0	ND
168	Williams	B	2012-02-14	0	ND
169	Williams	B	2012-02-14	0	ND
170	Williams	B	2012-02-14	0	ND
171	Williams	B	2012-02-14	0	ND
172	Williams	B	2012-02-14	0	ND
173	Williams	B	2012-02-14	0	ND
174	Williams	B	2012-02-14	0	ND
175	Williams	B	2012-02-14	0	ND
176	Williams	B	2012-02-14	0	ND
177	Williams	B	2012-02-14	0	ND
178	Williams	B	2012-02-14	0	ND
179	Williams	B	2012-02-14	0	ND
180	Williams	B	2012-02-14	1	0.73
181	Williams	B	2012-02-14	0	ND
120	Imperial Valley	Pen 11	2012-02-14	0	ND
121	Imperial Valley	Pen 11	2012-02-14	0	ND
122	Imperial Valley	Pen 11	2012-02-14	0	ND
123	Imperial Valley	Pen 11	2012-02-14	0	ND
124	Imperial Valley	Pen 11	2012-02-14	0	ND
125	Imperial Valley	Pen 11	2012-02-14	0	ND
126	Imperial Valley	Pen 11	2012-02-14	1	9.2
127	Imperial Valley	Pen 11	2012-02-14	0	ND
128	Imperial Valley	Pen 11	2012-02-14	0	ND
129	Imperial Valley	Pen 11	2012-02-14	1	0.92
130	Imperial Valley	Pen 11	2012-02-14	0	ND
131	Imperial Valley	Pen 11	2012-02-14	0	ND
132	Imperial Valley	Pen 11	2012-02-14	0	ND
133	Imperial Valley	Pen 11	2012-02-14	0	ND
134	Imperial Valley	Pen 11	2012-02-14	0	ND
135	Imperial Valley	Pen 11	2012-02-14	0	ND
136	Imperial Valley	Pen 11	2012-02-14	1	0.036
137	Imperial Valley	Pen 11	2012-02-14	1	93
138	Imperial Valley	Pen 11	2012-02-14	0	ND
139	Imperial Valley	Pen 11	2012-02-14	0	ND
140	Imperial Valley	Pen 45	2012-02-14	0	ND
141	Imperial Valley	Pen 45	2012-02-14	0	ND
142	Imperial Valley	Pen 45	2012-02-14	0	ND
143	Imperial Valley	Pen 45	2012-02-14	0	ND
144	Imperial Valley	Pen 45	2012-02-14	0	ND
145	Imperial Valley	Pen 45	2012-02-14	0	ND
146	Imperial Valley	Pen 45	2012-02-14	0	ND
147	Imperial Valley	Pen 45	2012-02-14	0	ND
148	Imperial Valley	Pen 45	2012-02-14	0	ND
149	Imperial Valley	Pen 45	2012-02-14	0	ND
150	Imperial Valley	Pen 46	2012-02-14	0	ND
151	Imperial Valley	Pen 46	2012-02-14	0	ND
152	Imperial Valley	Pen 46	2012-02-14	0	ND
153	Imperial Valley	Pen 46	2012-02-14	0	ND
154	Imperial Valley	Pen 46	2012-02-14	0	ND
155	Imperial Valley	Pen 46	2012-02-14	0	ND
156	Imperial Valley	Pen 46	2012-02-14	0	ND
157	Imperial Valley	Pen 46	2012-02-14	0	ND
158	Imperial Valley	Pen 46	2012-02-14	0	ND
159	Imperial Valley	Pen 46	2012-02-14	0	ND
182	Williams	Pen 789	2012-03-07	0	ND
183	Williams	Pen 789	2012-03-07	0	ND
184	Williams	Pen 789	2012-03-07	0	ND
185	Williams	Pen 789	2012-03-07	0	ND
186	Williams	Pen 789	2012-03-07	0	ND
187	Williams	Pen 789	2012-03-07	0	ND
188	Williams	Pen 789	2012-03-07	1	0.036
189	Williams	Pen 789	2012-03-07	0	ND
190	Williams	Pen 789	2012-03-07	0	ND
191	Williams	Pen 789	2012-03-07	0	ND
192	Williams	Pen 789	2012-03-07	0	ND
193	Williams	Pen 789	2012-03-07	0	ND
194	Williams	Pen 789	2012-03-07	0	ND
195	Williams	Pen 789	2012-03-07	0	ND
196	Williams	Pen 789	2012-03-07	0	ND
197	Williams	Pen 789	2012-03-07	0	ND
198	Williams	Pen 789	2012-03-07	0	ND
199	Williams	Pen 789	2012-03-07	0	ND
200	Williams	Pen 789	2012-03-07	0	ND
201	Williams	Pen 789	2012-03-07	0	ND
202	Williams	Pen 3	2012-03-07	0	ND
203	Williams	Pen 3	2012-03-07	0	ND
204	Williams	Pen 3	2012-03-07	0	ND
205	Williams	Pen 3	2012-03-07	0	ND
206	Williams	Pen 3	2012-03-07	0	ND
207	Williams	Pen 3	2012-03-07	1	0.036
208	Williams	Pen 3	2012-03-07	0	ND
209	Williams	Pen 3	2012-03-07	0	ND
210	Williams	Pen 3	2012-03-07	0	ND
211	Williams	Pen 3	2012-03-07	0	ND
212	Williams	Pen 3	2012-03-07	0	ND
213	Williams	Pen 3	2012-03-07	0	ND
214	Williams	Pen 3	2012-03-07	0	ND
215	Williams	Pen 3	2012-03-07	0	ND
216	Williams	Pen 3	2012-03-07	0	ND
217	Williams	Pen 3	2012-03-07	0	ND
218	Williams	Pen 3	2012-03-07	0	ND
219	Williams	Pen 3	2012-03-07	0	ND
220	Williams	Pen 3	2012-03-07	0	ND
221	Williams	Pen 3	2012-03-07	0	ND
160	Imperial Valley	Pens 30-31 Lot 511	2012-03-07	0	ND
161	Imperial Valley	Pens 30-31 Lot 511	2012-03-07	0	ND
162	Imperial Valley	Pens 30-31 Lot 511	2012-03-07	0	ND
163	Imperial Valley	Pens 30-31 Lot 511	2012-03-07	0	ND
164	Imperial Valley	Pens 30-31 Lot 511	2012-03-07	0	ND
165	Imperial Valley	Pens 30-31 Lot 511	2012-03-07	0	ND
166	Imperial Valley	Pens 30-31 Lot 511	2012-03-07	0	ND
167	Imperial Valley	Pens 30-31 Lot 511	2012-03-07	0	ND
168	Imperial Valley	Pens 30-31 Lot 511	2012-03-07	0	ND
169	Imperial Valley	Pens 30-31 Lot 511	2012-03-07	0	ND
170	Imperial Valley	Pens 30-31 Lot 511	2012-03-07	0	ND
171	Imperial Valley	Pens 30-31 Lot 511	2012-03-07	0	ND
172	Imperial Valley	Pens 30-31 Lot 511	2012-03-07	0	ND
173	Imperial Valley	Pens 30-31 Lot 511	2012-03-07	0	ND
174	Imperial Valley	Pens 30-31 Lot 511	2012-03-07	0	ND
175	Imperial Valley	Pens 30-31 Lot 511	2012-03-07	0	ND
176	Imperial Valley	Pens 30-31 Lot 511	2012-03-07	0	ND
177	Imperial Valley	Pens 30-31 Lot 511	2012-03-07	0	ND
178	Imperial Valley	Pens 30-31 Lot 511	2012-03-07	0	ND
179	Imperial Valley	Pens 30-31 Lot 511	2012-03-07	0	ND
180	Imperial Valley	Pens 30-31 Lot 511	2012-03-07	0	ND
181	Imperial Valley	Pens 30-31 Lot 511	2012-03-07	0	ND
182	Imperial Valley	Pens 30-31 Lot 511	2012-03-07	0	ND
183	Imperial Valley	Pens 30-31 Lot 511	2012-03-07	0	ND
184	Imperial Valley	Pens 30-31 Lot 511	2012-03-07	0	ND
185	Imperial Valley	Pens 30-31 Lot 511	2012-03-07	0	ND
186	Imperial Valley	Pens 30-31 Lot 511	2012-03-07	0	ND
187	Imperial Valley	Pens 30-31 Lot 511	2012-03-07	0	ND
188	Imperial Valley	Pens 30-31 Lot 511	2012-03-07	0	ND
189	Imperial Valley	Pens 30-31 Lot 511	2012-03-07	0	ND
190	Imperial Valley	Pens 30-31 Lot 511	2012-03-07	0	ND
191	Imperial Valley	Pens 30-31 Lot 511	2012-03-07	0	ND
192	Imperial Valley	Pens 30-31 Lot 511	2012-03-07	0	ND
193	Imperial Valley	Pens 30-31 Lot 511	2012-03-07	0	ND
194	Imperial Valley	Pens 30-31 Lot 511	2012-03-07	0	ND
195	Imperial Valley	Pens 30-31 Lot 511	2012-03-07	0	ND
196	Imperial Valley	Pens 30-31 Lot 511	2012-03-07	0	ND
197	Imperial Valley	Pens 30-31 Lot 511	2012-03-07	0	ND
198	Imperial Valley	Pens 30-31 Lot 511	2012-03-07	0	ND
199	Imperial Valley	Pens 30-31 Lot 511	2012-03-07	Cracked, Not Processed
222	Williams	Lot W21	2012-04-03	1	1.1
223	Williams	Lot W21	2012-04-03	1	4.2
224	Williams	Lot W21	2012-04-03	0	ND
225	Williams	Lot W21	2012-04-03	1	0.23
226	Williams	Lot W21	2012-04-03	0	ND
227	Williams	Lot W21	2012-04-03	0	ND
228	Williams	Lot W21	2012-04-03	0	ND
229	Williams	Lot W21	2012-04-03	0	ND
230	Williams	Lot W21	2012-04-03	0	ND
231	Williams	Lot W21	2012-04-03	0	ND
232	Williams	Lot W21	2012-04-03	1	0.036
233	Williams	Lot W21	2012-04-03	0	ND
234	Williams	Lot W21	2012-04-03	0	ND
235	Williams	Lot W21	2012-04-03	0	ND
236	Williams	Lot W21	2012-04-03	0	ND
237	Williams	Lot W21	2012-04-03	0	ND
238	Williams	Lot W21	2012-04-03	0	ND
239	Williams	Lot W21	2012-04-03	1	0.036
240	Williams	Lot W21	2012-04-03	0	ND
241	Williams	Lot W2	2012-04-03	0	ND
242	Williams	Lot W2	2012-04-03	0	ND
243	Williams	Lot W2	2012-04-03	0	ND
244	Williams	Lot W2	2012-04-03	0	ND
245	Williams	Lot W2	2012-04-03	0	ND
246	Williams	Lot W2	2012-04-03	0	ND
247	Williams	Lot W2	2012-04-03	0	ND
248	Williams	Lot W2	2012-04-03	1	21
249	Williams	Lot W2	2012-04-03	0	ND
250	Williams	Lot W2	2012-04-03	0	ND
251	Williams	Lot W2	2012-04-03	0	ND
252	Williams	Lot W2	2012-04-03	0	ND
253	Williams	Lot W2	2012-04-03	0	ND
254	Williams	Lot W2	2012-04-03	0	ND
255	Williams	Lot W2	2012-04-03	0	ND
256	Williams	Lot W2	2012-04-03	0	ND
257	Williams	Lot W2	2012-04-03	0	ND
258	Williams	Lot W2	2012-04-03	0	ND
259	Williams	Lot W2	2012-04-03	0	ND
260	Williams	Lot W2	2012-04-03	0	ND
261	Williams	Lot W2	2012-04-03	0	ND
200	Imperial Valley	Pen 8 Lot 476	2012-04-03	1	0.23
201	Imperial Valley	Pen 8 Lot 476	2012-04-03	0	ND
202	Imperial Valley	Pen 8 Lot 476	2012-04-03	0	ND
203	Imperial Valley	Pen 8 Lot 476	2012-04-03	0	ND
204	Imperial Valley	Pen 8 Lot 476	2012-04-03	0	ND
205	Imperial Valley	Pen 8 Lot 476	2012-04-03	0	ND
206	Imperial Valley	Pen 8 Lot 476	2012-04-03	0	ND
207	Imperial Valley	Pen 8 Lot 476	2012-04-03	0	ND
208	Imperial Valley	Pen 8 Lot 476	2012-04-03	0	ND
209	Imperial Valley	Pen 8 Lot 476	2012-04-03	0	ND
210	Imperial Valley	Pen 8 Lot 476	2012-04-03	0	ND
211	Imperial Valley	Pen 8 Lot 476	2012-04-03	0	ND
212	Imperial Valley	Pen 8 Lot 476	2012-04-03	0	ND
213	Imperial Valley	Pen 8 Lot 476	2012-04-03	0	ND
214	Imperial Valley	Pen 8 Lot 476	2012-04-03	0	ND
215	Imperial Valley	Pen 8 Lot 476	2012-04-03	0	ND
216	Imperial Valley	Pen 8 Lot 476	2012-04-03	0	ND
217	Imperial Valley	Pen 8 Lot 476	2012-04-03	0	ND
218	Imperial Valley	Pen 8 Lot 476	2012-04-03	0	ND
219	Imperial Valley	Pen 8 Lot 476	2012-04-03	0	ND
220	Imperial Valley	Pen 41 Lot 511	2012-04-03	0	ND
221	Imperial Valley	Pen 41 Lot 511	2012-04-03	0	ND
222	Imperial Valley	Pen 41 Lot 511	2012-04-03	1	0.38
223	Imperial Valley	Pen 41 Lot 511	2012-04-03	1	0.38
224	Imperial Valley	Pen 41 Lot 511	2012-04-03	0	ND
225	Imperial Valley	Pen 41 Lot 511	2012-04-03	0	ND
226	Imperial Valley	Pen 41 Lot 511	2012-04-03	0	ND
227	Imperial Valley	Pen 41 Lot 511	2012-04-03	1	0.036
228	Imperial Valley	Pen 41 Lot 511	2012-04-03	0	ND
229	Imperial Valley	Pen 42 Lot 511	2012-04-03	0	ND
230	Imperial Valley	Pen 42 Lot 511	2012-04-03	1	0.62
231	Imperial Valley	Pen 42 Lot 511	2012-04-03	0	ND
232	Imperial Valley	Pen 42 Lot 511	2012-04-03	0	ND
233	Imperial Valley	Pen 42 Lot 511	2012-04-03	1	1.5
234	Imperial Valley	Pen 42 Lot 511	2012-04-03	1	2.8
235	Imperial Valley	Pen 42 Lot 511	2012-04-03	1	0.036
236	Imperial Valley	Pen 42 Lot 511	2012-04-03	0	ND
237	Imperial Valley	Pen 42 Lot 511	2012-04-03	0	ND
238	Imperial Valley	Pen 42 Lot 511	2012-04-03	1	0.21
239	Imperial Valley	Pen 42 Lot 511	2012-04-03	0	ND
161	Texas	Lot B	2012-05-23	0	ND
162	Texas	Lot B	2012-05-23	0	ND
163	Texas	Lot B	2012-05-23	0	ND
164	Texas	Lot B	2012-05-23	1	1.5
165	Texas	Lot B	2012-05-23	0	ND
166	Texas	Lot B	2012-05-23	0	ND
167	Texas	Lot B	2012-05-23	0	ND
168	Texas	Lot B	2012-05-23	0	ND
169	Texas	Lot B	2012-05-23	0	ND
170	Texas	Lot B	2012-05-23	0	ND
171	Texas	Lot B	2012-05-23	0	ND
172	Texas	Lot B	2012-05-23	0	ND
173	Texas	Lot B	2012-05-23	0	ND
174	Texas	Lot B	2012-05-23	0	ND
175	Texas	Lot B	2012-05-23	0	ND
176	Texas	Lot B	2012-05-23	0	ND
177	Texas	Lot B	2012-05-23	0	ND
178	Texas	Lot B	2012-05-23	0	ND
179	Texas	Lot B	2012-05-23	0	ND
180	Texas	Lot B	2012-05-23	0	ND
181	Texas	Lot B	2012-05-23	0	ND
182	Texas	Lot B	2012-05-23	0	ND
183	Texas	Lot B	2012-05-23	1	0.036
184	Texas	Lot B	2012-05-23	0	ND
185	Texas	Lot B	2012-05-23	0	ND
186	Texas	Lot B	2012-05-23	0	ND
187	Texas	Lot B	2012-05-23	1	0.74
188	Texas	Lot B	2012-05-23	0	ND
189	Texas	Lot B	2012-05-23	0	ND
190	Texas	Lot B	2012-05-23	1
191	Texas	Lot B	2012-05-23	0	ND
192	Texas	Lot B	2012-05-23	0	ND
193	Texas	Lot B	2012-05-23	1
194	Texas	Lot B	2012-05-23	0	ND
195	Texas	Lot B	2012-05-23	1
196	Texas	Lot B	2012-05-23	1
197	Texas	Lot B	2012-05-23	1	0.23
198	Texas	Lot B	2012-05-23	1	0.15
199	Texas	Lot B	2012-05-23	0	ND
200	Texas	Lot B	2012-05-23	1	0.93
201	Texas	Lot B	2012-05-23	0	ND
202	Texas	Lot B	2012-05-23	0	ND
203	Texas	Lot B	2012-05-23	0	ND
204	Texas	Lot B	2012-05-23	1	0.092
205	Texas	Lot B	2012-05-23	0	ND
206	Texas	Lot B	2012-05-23	0	ND
207	Texas	Lot B	2012-05-23	0	ND
208	Texas	Lot B	2012-05-23	0	ND
209	Texas	Lot B	2012-05-23	0	ND
210	Texas	Lot B	2012-05-23	0	ND
211	Texas	Lot B	2012-05-23	0	ND
212	Texas	Lot B	2012-05-23	0	ND
213	Texas	Lot B	2012-05-23	1	0.23
214	Texas	Lot B	2012-05-23	0	ND
215	Texas	Lot B	2012-05-23	0	ND
216	Texas	Lot B	2012-05-23	0	ND
217	Texas	Lot B	2012-05-23	1	0.036
218	Texas	Lot B	2012-05-23	1	4.4
219	Texas	Lot B	2012-05-23	0	ND
220	Texas	Lot B	2012-05-23	0	ND
221	Texas	Lot B	2012-05-23	0	ND
222	Texas	Lot B	2012-05-23	0	ND
223	Texas	Lot B	2012-05-23	0	ND
224	Texas	Lot B	2012-05-23	0	ND
225	Texas	Lot B	2012-05-23	0	ND
226	Texas	Lot B	2012-05-23	0	ND
227	Texas	Lot B	2012-05-23	0	ND
228	Texas	Lot B	2012-05-23	0	ND
229	Texas	Lot B	2012-05-23	0	ND
230	Texas	Lot B	2012-05-23	1	9.2
231	Texas	Lot B	2012-05-23	0	ND
232	Texas	Lot B	2012-05-23	0	ND
233	Texas	Lot B	2012-05-23	0	ND
234	Texas	Lot B	2012-05-23	0	ND
235	Texas	Lot B	2012-05-23	0	ND
236	Texas	Lot B	2012-05-23	0	ND
237	Texas	Lot B	2012-05-23	0	ND
238	Texas	Lot B	2012-05-23	0	ND
239	Texas	Lot B	2012-05-23	0	ND
240	Texas	Lot B	2012-05-23	0	ND

## Sheet: Stats updated till 1-30-12
		2012-11-25	2012-01-31
	Total #samples received:	341	581
	Texas:	240	321
	Williams:	61	141
	Imperial Valley:	40	119
		2012-11-25	2012-01-31
	Total # samples positive:	113	161
	Texas:	53	62
	Williams:	27	40
	Imperial Valley:	33	59
		Date Updated	Location	# Positive	# Samples Processed	% Prevalence
		2011-11-25	Texas:	53	240	22.0833
		2011-11-25	Williams:	27	61	44.2623
		2011-11-25	Imperial Valley	33	40	82.5
		2012-01-31	Texas	62	312	19.8718
		2012-01-31	Williams	40	141	28.3688
		2012-01-31	Imperial Valley	59	119	49.5798

## Sheet: Summary
Summary by date and lot																										% pos
	Date	Lot	# samples	# positive	% pos	Mean MPN	Median MPN
Williams	2011-09-13	W	19	12	0.631579	72.875	21.5	23	20	13	23	6.1	23	700	23	2.3	6.1	23	12							Mean	0.224854
Texas	2011-09-27	A1	20	4	0.2	121.575	27	430	43	11	2.3															Standard Error	0.0366922
	2011-09-27	A2	20	0	0		0																			Median	0.15
Texas	2011-10-04	B1	20	10	0.5	5.918	4.2	0.036	0.072	11	0.036	4.2	7.4	23	9.2	0.036	4.2									Mode	0
	2011-10-04	B2	20	2	0.1	5.518	5.518	11	0.036																	Standard Deviation	0.240607
Texas	2011-10-19	A3	20	4	0.2	38.568	2.118	4.2	150	0.036	0.036															Sample Variance	0.0578918
	2011-10-19	A4	20	2	0.1	1.765	1.765	2.8	0.73																	Kurtosis	0.192719
Texas	2011-10-25	B3	20	7	0.35	34.9474	0.73	2.3	0.92	0.036	240	0.73	0.036	0.61												Skewness	1.00009
	2011-10-25	B4	19	5	0.263158	2.3144	0.3	7.4	0.036	0.036	0.3	3.8														Range	0.9		0.150806
Williams	2011-10-27	A1	21	5	0.238095	48.726	0.3	240	2.8	0.3	0.3	0.23														Minimum	0		0.298902
	2011-10-27	B1	21	10	0.47619	16.2624	0.615	7.4	150	0.62	2	0.036	0.036	0.61	1.6	0.23	0.092									Maximum	0.9
ImpVal	2011-11-03	A1	20	18	0.9	684.331	96.5	0.73	920	0.92	15	150	240	2300	7	2.1	210	3.7	1.1	43	4.4	430	280	7500	210	Sum	9.66873
	2011-11-03	A2	20	15	0.75	65.6753	9.2	0.73	2.1	9.2	15	4.2	23	9.2	9.2	1.1	430	4.2	1.4	430	2.8	43				Count	43
Texas	2011-11-08	A5	20	0	0		0																			Confidence Level(95.0%)	0.0740479
	2011-11-08	A6	20	3	0.15	1.48867	0.23	4.2	0.23	0.036
Texas	2011-11-15	B5	20	10	0.5	4.1246	2.3	2.3	0.36	0.3	9.2	15	2.3	0.036	4.2	0.15	7.4
	2011-11-15	B6	20	6	0.3	0.838	0.198	0.36	0.036	0.36	0.036	0.036	4.2
Texas	2011-12-06	A7	18	0	0		0
	2011-12-06	A8	17	0	0		0
Texas	2011-12-06	B7	18	9	0.5	0.812778	0.092	2.6	0.036	0.036	0.092	0.092	0.073	0.15	0.036	4.2
	2011-12-06	B8	18	0	0		0
ImpVal	2011-12-13	476_20	19	10	0.526316	51.588	0.775	0.62	2	0.2	23	28	0.15	0.36	460	0.63	0.92
	2011-12-13	487_53	20	10	0.5	69.3582	1.95	93	0.11	1.5	0.036	150	2.4	1.5	430	0.036	15
Williams	2011-12-13	A2	20	13	0.65	2126.29	3.6	1.1	0.74	0.33	23000	24	0.36	2300	0.092	6.1	3.6	1.1	4.4	2300
	2011-12-13	B2	20	0	0		0
ImpVal	2012-01-18	476_20	20	6	0.3	3500.23	0.15	0.15	0.96	21000	0.036	0.072	0.15
	2012-01-18	39_40	20	0	0		0
Williams	2012-01-18	A3	20	0	0		0
	2012-01-18	B3	20	0	0		0
Williams	2012-02-14	A4	20	1	0.05	9.2	9.2	9.2
	2012-02-14	B4	21	1	0.047619	0.73	0.73	0.73
ImpVal	2012-02-14	11	20	4	0.2	25.789	5.06	9.2	0.92	0.036	93
	2012-02-14	45	20	0	0		0
Williams	2012-03-07	789	20	1	0.05	0.036	0.036	0.036
	2012-03-07	3	20	1	0.05	0.036	0.036	0.036
ImpVal	2012-03-07	30	20	0	0		0
	2012-03-07	31	19	0	0		0
Williams	2011-04-03	W21	19	5	0.263158	1.1204	0.23	1.1	4.2	0.23	0.036	0.036
	2011-04-03	W2	21	1	0.047619	21	21	21
ImpVal	2011-04-03	8	20	1	0.05	0.23	0.23	0.23
	2011-04-03	41	20	8	0.4	0.74525	0.38	0.38	0.38	0.036	0.62	1.5	2.8	0.036	0.21
Texas	2012-05-23	B9	40	9	0.225	0.5312	0.23	1.5	0.036	0.74	0.23	0.15
	2012-05-23	B10	40	6	0.15	2.48133	0.58	0.93	0.092	0.23	0.036	4.4	9.2
			890	199	0.223596		43 pens	12 negative
								31 positive
								0.72093	proportion of positive pens

## Sheet: Temp regression
								Prior temp
	Date	Lot	# samples	# positive	% pos	Mean MPN	Median MPN of positive samples	high	low	prior precip	low	% pos	Mean max T	% pos	Mean min	% pos	Mean max	% pos
Williams	2011-09-13	W	19	12	0.631579	72.875	21.5	90	60	0	60	0.631579	90	0.631579	15.5556	0.631579	32.2222	0.631579
Texas	2011-09-27	A1	20	4	0.2	121.575	27	89	61	1.2	61	0.2	89	0.2	16.1111	0.2	31.6667	0.2				SUMMARY OUTPUT											SUMMARY OUTPUT		Regression of mean maximum temp on % positive samples										SUMMARY OUTPUT		Regression of mean minimum temp on % positive
	2011-09-27	A2	20	0	0		0	89	61	1.2	61	0	89	0	16.1111	0	31.6667	0
Texas	2011-10-04	B1	20	10	0.5	5.918	4.2	85	56	1.2	56	0.5	85	0.5	13.3333	0.5	29.4444	0.5				Regression Statistics											Regression Statistics												Regression Statistics
	2011-10-04	B2	20	2	0.1	5.518	5.518	85	56	1.2	56	0.1	85	0.1	13.3333	0.1	29.4444	0.1				Multiple R	0.451339										Multiple R	0.433696											Multiple R	0.507072
Texas	2011-10-19	A3	20	4	0.2	38.568	2.118	83	52	0.4	52	0.2	83	0.2	11.1111	0.2	28.3333	0.2				R Square	0.203707										R Square	0.188092											R Square	0.257122
	2011-10-19	A4	20	2	0.1	1.765	1.765	83	52	0.4	52	0.1	83	0.1	11.1111	0.1	28.3333	0.1				Adjusted R Square	0.183289										Adjusted R Square	0.16829											Adjusted R Square	0.239003
Texas	2011-10-25	B3	20	7	0.35	34.9474	0.73	82	51	0.4	51	0.35	82	0.35	10.5556	0.35	27.7778	0.35				Standard Error	0.222548										Standard Error	0.219429											Standard Error	0.209894
	2011-10-25	B4	19	5	0.263158	2.3144	0.3	82	51	0.4	51	0.263158	82	0.263158	10.5556	0.263158	27.7778	0.263158				Observations	41										Observations	43											Observations	43
Williams	2011-10-27	A1	21	5	0.238095	48.726	0.3	85	51	1	51	0.238095	85	0.238095	10.5556	0.238095	29.4444	0.238095
	2011-10-27	B1	21	10	0.47619	16.2624	0.615	85	51	1	51	0.47619	85	0.47619	10.5556	0.47619	29.4444	0.47619				ANOVA											ANOVA												ANOVA
ImpVal	2011-11-03	A1	20	18	0.9	684.331	96.5	92	70	0	70	0.9	92	0.9	21.1111	0.9	33.3333	0.9					df	SS	MS	F	Significance F							df	SS	MS	F	Significance F								df	SS	MS	F
	2011-11-03	A2	20	15	0.75	65.6753	9.2	92	70	0	70	0.75	92	0.75	21.1111	0.75	33.3333	0.75				Regression	1	0.494136	0.494136	9.97696	0.00305765						Regression	1	0.457338	0.457338	9.49834	0.00366779							Regression	1	0.625181	0.625181	14.1908
Texas	2011-11-08	A5	20	0	0		0	73	44	1	44	0	73	0	6.66667	0	22.7778	0				Residual	39	1.93158	0.0495277								Residual	41	1.97412	0.0481492									Residual	41	1.80627	0.0440555
	2011-11-08	A6	20	3	0.15	1.48867	0.23	73	44	1	44	0.15	73	0.15	6.66667	0.15	22.7778	0.15				Total	40	2.42572									Total	42	2.43145										Total	42	2.43145
Texas	2011-11-15	B5	20	10	0.5	4.1246	2.3	72	41	0.9	41	0.5	72	0.5	5	0.5	22.2222	0.5
	2011-11-15	B6	20	6	0.3	0.838	0.198	72	41	0.9	41	0.3	72	0.3	5	0.3	22.2222	0.3					Coefficients	Standard Error	t Stat	P-value	Lower 95%	Upper 95%	Lower 95.0%	Upper 95.0%				Coefficients	Standard Error	t Stat	P-value	Lower 95%	Upper 95%	Lower 95.0%	Upper 95.0%					Coefficients	Standard Error	t Stat	P-value
Texas	2011-12-06	A7	18	0	0		0	59	35	0.8	35	0	59	0	1.66667	0	15	0				Intercept	-0.513329	0.236844	-2.16737	0.0363743	-0.992392	-0.0342659	-0.992392	-0.0342659			Intercept	-0.476198	0.229919	-2.07115	0.0446781	-0.940529	-0.0118664	-0.940529	-0.0118664				Intercept	-0.379679	0.16364	-2.32021	0.0253844
	2011-12-06	A8	17	0	0		0	59	35	0.8	35	0	59	0	1.66667	0	15	0				X Variable 1	0.0100999	0.00319757	3.15863	0.00305765	0.00363225	0.0165676	0.00363225	0.0165676			Mean max T	0.00950354	0.00308363	3.08194	0.00366779	0.00327604	0.0157311	0.00327604	0.0157311				low	0.0129975	0.00345029	3.76706	0.000520109
Texas	2011-12-06	B7	18	9	0.5	0.812778	0.092	59	35	0.8	35	0.5	59	0.5	1.66667	0.5	15	0.5
	2011-12-06	B8	18	0	0		0	59	35	0.8	35	0	59	0	1.66667	0	15	0
ImpVal	2011-12-13	476_20	19	10	0.526316	51.588	0.775	76	46	0.05	46	0.526316	76	0.526316	7.77778	0.526316	24.4444	0.526316																														SUMMARY OUTPUT
	2011-12-13	487_53	20	10	0.5	69.3582	1.95	76	46	0.05	46	0.5	76	0.5	7.77778	0.5	24.4444	0.5
Williams	2011-12-13	A2	20	13	0.65	2126.29	3.6	60	40	1.4	40	0.65	60	0.65	4.44444	0.65	15.5556	0.65																														Regression Statistics
	2011-12-13	B2	20	0	0		0	60	40	1.4	40	0	60	0	4.44444	0	15.5556	0																														Multiple R	0.433696
ImpVal	2012-01-18	476_20	20	6	0.3	3500.23	0.15	68	38	0.03	38	0.3	68	0.3	3.33333	0.3	20	0.3																														R Square	0.188092
	2012-01-18	39_40	20	0	0		0	68	38	0.03	38	0	68	0	3.33333	0	20	0																														Adjusted R Square	0.16829
Williams	2012-01-18	A3	20	0	0		0	62	32	0	32	0	62	0	0	0	16.6667	0																														Standard Error	0.219429
	2012-01-18	B3	20	0	0		0	62	32	0	32	0	62	0	0	0	16.6667	0																														Observations	43
Williams	2012-02-14	A4	20	1	0.05	9.2	9.2	60	40	4.5	40	0.05	60	0.05	4.44444	0.05	15.5556	0.05
	2012-02-14	B4	21	1	0.047619	0.73	0.73	60	40	4.5	40	0.047619	60	0.047619	4.44444	0.047619	15.5556	0.047619																														ANOVA
ImpVal	2012-02-14	11	20	4	0.2	25.789	5.06	71	43	0	43	0.2	71	0.2	6.11111	0.2	21.6667	0.2																															df
	2012-02-14	45	20	0	0		0	71	43	0	43	0	71	0	6.11111	0	21.6667	0																														Regression	1
Williams	2012-03-07	789	20	1	0.05	0.036	0.036	62	42	0.9	42	0.05	62	0.05	5.55556	0.05	16.6667	0.05																														Residual	41
	2012-03-07	3	20	1	0.05	0.036	0.036	62	42	0.9	42	0.05	62	0.05	5.55556	0.05	16.6667	0.05																														Total	42
ImpVal	2012-03-07	30	20	0	0		0	78	43	0	43	0	78	0	6.11111	0	25.5556	0
	2012-03-07	31	19	0	0		0	78	43	0	43	0	78	0	6.11111	0	25.5556	0																															Coefficients
Williams	2012-04-03	W21	19	5	0.263158	1.1204	0.23	62	44	4.5	44	0.263158	62	0.263158	6.66667	0.263158	16.6667	0.263158																														Intercept	-0.172084
	2012-04-03	W2	21	1	0.047619	21	21	62	44	4.5	44	0.047619	62	0.047619	6.66667	0.047619	16.6667	0.047619																														Mean max	0.0171064
ImpVal	2012-04-03	8	20	1	0.05	0.23	0.23	79	49	0	49	0.05	79	0.05	9.44444	0.05	26.1111	0.05
	2012-04-03	41	20	8	0.4	0.74525	0.38	79	49	0	49	0.4	79	0.4	9.44444	0.4	26.1111	0.4
Texas	2012-05-22	B9	40	9	0.225	0.5312	0.23	84	57	1.5	57	0.225	84	0.225	13.8889	0.225	28.8889	0.225
	2012-05-22	B10	40	6	0.15	2.48133	0.58	84	57	1.5	57	0.15	84	0.15	13.8889	0.15	28.8889	0.15
[truncated: 7 more columns]

## Sheet: MPN freq
MPNs	MPNs
23	0.036							23	430	0.036	11	4.2	2.8	2.8	7.4	240	7.4	0.73	0.73	4.2	2.3	0.36	2.6	0.62	93	1.1	0.15	9.2	0.73	9.2	0.036	0.036	1.1	21	0.23	0.38	1.5	0.93
20	0.036		0					20	43	0.072	0.036	150	0.73	0.73	0.036	2.8	150	920	2.1	0.23	0.36	0.036	0.036	2	0.11	0.74	0.96			0.92			4.2			0.38	0.036	0.092
13	0.036		0.1					13	11	11		0.036		0.036	0.036	0.3	0.62	0.92	9.2	0.036	0.3	0.36	0.036	0.2	1.5	0.33	21000			0.036			0.23			0.036	0.74	0.23
23	0.036		1					23	2.3	0.036		0.036		240	0.3	0.3	2	15	15		9.2	0.036	0.092	23	0.036	23000	0.036			93			0.036			0.62	0.23	0.036
6.1	0.036		10					6.1		4.2				0.73	3.8	0.23	0.036	150	4.2		15	0.036	0.092	28	150	24	0.072						0.036			1.5	0.15	4.4
23	0.036		100					23		7.4				0.036			0.036	240	23		2.3	4.2	0.073	0.15	2.4	0.36	0.15									2.8		9.2
700	0.036		1000					700		23				0.61			0.61	2300	9.2		0.036		0.15	0.36	1.5	2300										0.036
23	0.036		10000					23		9.2							1.6	7	9.2		4.2		0.036	460	430	0.092										0.21
2.3	0.036		100000					2.3		0.036							0.23	2.1	1.1		0.15		4.2	0.63	0.036	6.1
6.1	0.036							6.1		4.2							0.092	210	430		7.4			0.92	15	3.6
23	0.036							23										3.7	4.2							1.1
12	0.036							12										1.1	1.4							4.4
430	0.036																	43	430							2300
43	0.036																	4.4	2.8
11	0.036																	430	43
2.3	0.036																	280
0.036	0.036																	7500
0.072	0.036																	210
11	0.036
0.036	0.036
4.2	0.036
7.4	0.036							2.86173	4.13347	0.0563025	2.54139	2.12325	1.94716	1.94716	2.36923	3.88021	2.36923	1.36332	1.36332	2.12325	1.86173	1.0563	1.91497	1.29239	3.46848	1.54139	0.676091	2.46379	1.36332	2.46379	0.0563025	0.0563025	1.54139	2.82222	0.861728	1.07978	1.67609	1.46848
23	0.036							2.80103	3.13347	0.357332	0.0563025	3.67609	1.36332	1.36332	0.0563025	1.94716	3.67609	4.46379	1.82222	0.861728	1.0563	0.0563025	0.0563025	1.80103	0.541393	1.36923	1.48227			1.46379			2.12325			1.07978	0.0563025	0.463788
9.2	0.036							2.61394	2.54139	2.54139		0.0563025		0.0563025	0.0563025	0.977121	1.29239	1.46379	2.46379	0.0563025	0.977121	1.0563	0.0563025	0.80103	1.67609	1.01851	5.82222			0.0563025			0.861728			0.0563025	1.36923	0.861728
0.036	0.036							2.86173	1.86173	0.0563025		0.0563025		3.88021	0.977121	0.977121	1.80103	2.67609	2.67609		2.46379	0.0563025	0.463788	2.86173	0.0563025	5.86173	0.0563025			3.46848			0.0563025			1.29239	0.861728	0.0563025
4.2	0.036							2.28533		2.12325				1.36332	2.07978	0.861728	0.0563025	3.67609	2.12325		2.67609	0.0563025	0.463788	2.94716	3.67609	2.88021	0.357332						0.0563025			1.67609	0.676091	2.14345
11	0.036							2.86173		2.36923				0.0563025			0.0563025	3.88021	2.86173		1.86173	2.12325	0.363323	0.676091	1.88021	1.0563	0.676091									1.94716		2.46379
0.036	0.036							4.3451		2.86173				1.28533			1.28533	4.86173	2.46379		0.0563025		0.676091	1.0563	1.67609	4.86173										0.0563025
4.2	0.036							2.86173		2.46379							1.70412	2.3451	2.46379		2.12325		0.0563025	4.16276	4.13347	0.463788										0.822219
150	0.036							1.86173		0.0563025							0.861728	1.82222	1.54139		0.676091		2.12325	1.29934	0.0563025	2.28533
0.036	0.036							2.28533		2.12325							0.463788	3.82222	4.13347		2.36923			1.46379	2.67609	2.0563
0.036	0.036							2.86173										2.0682	2.12325							1.54139
2.8	0.072							2.57918										1.54139	1.64613							2.14345
0.73	0.072																	3.13347	4.13347							4.86173
2.8	0.073																	2.14345	1.94716
0.73	0.092																	4.13347	3.13347
0.036	0.092																	3.94716
240	0.092																	5.37506
0.73	0.092																	3.82222
0.036	0.092
0.61	0.11
7.4	0.15
0.036	0.15
0.036	0.15		Bin	Frequency	Cumulative %	Bin	Frequency	Cumulative %
0.3	0.15		0	0	0	10	58	0.297436
3.8	0.15		0.1	40	0.205128	1	47	0.538462
240	0.15		1	47	0.446154	0.1	40	0.74359
2.8	0.2		10	58	0.74359	100	26	0.876923
0.3	0.21		100	26	0.876923	1000	18	0.969231
0.3	0.23		1000	18	0.969231	10000	4	0.989744
0.23	0.23		10000	4	0.989744	100000	2	1				MPN/g feces	Frequency	Cumulative %
7.4	0.23		100000	2	1	0	0	1				0 - 0.1	40	0.205128
150	0.23		More	0	1	More	0	1				0.1 - 1.0	47	0.446154
0.62	0.23											1.0 - 10	58	0.74359
2	0.23											10 - 100	26	0.876923
0.036	0.23											100 - 1,000	18	0.969231
0.036	0.3											1,000 - 10,000	4	0.989744
0.61	0.3											10,000 - 100,000	2	1
1.6	0.3
0.23	0.3
0.092	0.33
0.73	0.36
920	0.36
0.92	0.36
15	0.36
150	0.36
240	0.38
2300	0.38
7	0.61
2.1	0.61
210	0.62
3.7	0.62
1.1	0.62
43	0.63
4.4	0.73											MPN/g feces	Frequency	Cumulative %	Cumulative %
430	0.73											0	691	0.77991
280	0.73											0.01 - 0.1	40	0.825056	0.205128
7500	0.73											0.1 - 1.0	47	0.878104	0.446154
210	0.73											1.0 - 10	58	0.943567	0.74359
0.73	0.73											10 - 100	26	0.972912	0.876923
2.1	0.74											100 - 1,000	18	0.993228	0.969231
9.2	0.74											1,000 - 10,000	4	0.997743	0.989744
15	0.92											10,000 - 100,000	2	1	1
4.2	0.92												886
23	0.92
9.2	0.93
9.2	0.96
1.1	1.1
430	1.1
4.2	1.1
1.4	1.1
430	1.1
2.8	1.4
43	1.5
4.2	1.5
0.23	1.5
0.036	1.5
2.3	1.6
0.36	2
0.3	2
9.2	2.1
15	2.1
2.3	2.3
0.036	2.3
4.2	2.3
0.15	2.3
7.4	2.4
0.36	2.6
0.036	2.8
0.36	2.8
0.036	2.8
0.036	2.8
4.2	2.8
2.6	3.6
0.036	3.7
0.036	3.8
0.092	4.2
0.092	4.2
0.073	4.2
0.15	4.2
0.036	4.2
4.2	4.2
0.62	4.2
2	4.2
0.2	4.2
23	4.2
28	4.4
0.15	4.4
0.36	4.4
460	6.1
0.63	6.1
0.92	6.1
93	7
0.11	7.4
1.5	7.4
0.036	7.4
150	7.4
2.4	9.2
1.5	9.2
430	9.2
0.036	9.2
15	9.2
1.1	9.2
0.74	9.2
0.33	9.2
23000	11
24	11
0.36	11
2300	12
0.092	13
6.1	15
3.6	15
1.1	15
4.4	15
2300	20
0.15	21
0.96	23
21000	23
0.036	23
0.072	23
0.15	23
9.2	23
0.73	23
9.2	23
0.92	24
0.036	28
93	43
0.036	43
0.036	43
1.1	93
4.2	93
0.23	150
0.036	150
0.036	150
21	150
0.23	210
0.38	210
0.38	240
0.036	240
0.62	240
1.5	280
2.8	430
0.036	430
0.21	430
1.5	430
0.036	430
0.74	460
0.23	700
0.15	920
0.93	2300
0.092	2300
0.23	2300
0.036	7500
4.4	21000
9.2	23000
	195

## Sheet: Questionnaire (2)
	Date	Lot	# samples	# positive	% pos	Mean MPN	Median MPN of positive samples	Watersource	BeefStrs	Beefhfrs	Beefcows	Dairystrs	Dairyhfrs	Total	Age	sqft	arrivedate	DOF	initwe	currwt	pencover	watercover	pensurface	daysempty	penscraped	pengrrom	timesgroomed	mound	waterclean	howwaterclean	feedbunks	bunkclean	cleanmeth	floorfeed	concperc	conchowlong	conctype	proteinsupp	roughage	ionophore	additive	cattlesource	sourcenumb	casesdiarr	casesresp	died
Williams	2011-09-13	W	19	12	0.631579	72.875	21.5	4	0	0	40	0	0	40	14	20000	2011-09-09	4	1100	1100	2	2	0	90	2		0	1		0	0	4	3	1	40	4	5		3	1	1	1	3	0	0	0
Williams	2011-10-27	A1	21	5	0.238095	48.726	0.3	4	0	25	0	0	0	25	9	23625	2011-09-27	30	875	900	2	2	0	180	1		0	1	999	0	0		0	0	20	20	5		2	1	1	0	0	0	0	0
	2011-10-27	B1	21	10	0.47619	16.2624	0.615	4	0	20	0	0	0	20	8	23625	2011-09-27	30	850	875	2	2	0	180	1		0	1	999	0	0		0	0	20	20	5		2	1	1	0	0	0	0	0
ImpVal	2011-11-03	A1	20	18	0.9	684.331	96.5	2	0	0	80	0	0	80	5	9000	2011-10-06	28	274	340	0	2	0	4	0		3	1	30	2	0		3	1	89	25	1		2	0	0	0	6	999	999	0
	2011-11-03	A2	20	15	0.75	65.6753	9.2	2	155	0	0	0	0	155	12	15000	2011-03-15	233	280	950	0	2	0	4	0		4	1	30	2	0		3	1	89	220	1		2	0	0	0	6	999	999	3
ImpVal	2011-12-13	476_20	19	10	0.526316	51.588	0.775	1	0	0	80	80	0	160	7	9000	2011-12-01	12	274	300	0	2	0	4	0		3	1	30	2	0		3	1	89	12	1		2	0	0	0	6	0	1	0
	2011-12-13	487_53	20	10	0.5	69.3582	1.95	1	0	0	80	80	0	160	9	9000	2011-10-06	68	280	400	0	2	0	4	0		3	1	30	2	0		3	1	89	90	1		2	0	0	0	6	0	10	0
Williams	2011-12-13	A2	20	13	0.65	2126.29	3.6	4	0	225	0	0	0	225	6	67500	2011-12-01	12	450	460	2	2	0	150	0		0	1	30	1	0	15	3	1	10	13	5		2	1	1	1	1	0	35	0
	2011-12-13	B2	20	0	0		0	4	0	50	0	0	0	50	13	45000	2011-10-15	59	900	1000	2	2	0	50	0		0	1	999	999	0	15	3	0	30	30	5		4	1	1	0	0	0	0	0
ImpVal	2012-01-18	476_20	20	6	0.3	3500.23	0.15	1	160	0	0	0	0	160	4	10000	2012-01-03	15	284	295	0	2	0		0		1	1	30	2	0		3	1	88	14	1		2	0	0	0	6	5	1	0
	2012-01-18	39_40	20	0	0		0	1	155	0	0	0	0	155		15000			640		0	2	0		0		1	1	30	2	0		3	1	88	150	1		2	0	0	0	6	5	6	3
Williams	2012-01-18	A3	20	0	0		0	4	0	50	0	0	0	50	7	47250	2011-12-02	47	425	525	2	2	0	180	0		0	1	180	1	0		3	1	20	14	5		2	1	1	1	1	0	20	3
	2012-01-18	B3	20	0	0		0	4	0	30	0	0	0	30	13	23625	2011-11-15	64	900	1300	2	2	0	90	1	1	0	1	999	0	0		3	0	40	30	5		2	1	1	0	0	0	0	0
Williams	2012-02-14	A4	20	1	0.05	9.2	9.2	4	10	15	0	0	0	25	7	20000	2012-02-07	7	700	725	2	2	0	120	1	1	0	1	999	0	0	7	3	1	10	7	5		2	1	1	0	0	0	0	0
	2012-02-14	B4	21	1	0.047619	0.73	0.73	4	35	0	0	0	0	35	8	12000	2011-12-10	66	550	750	2	2	0	120	0		0	1	14	2	0	15	3	1	40	10	1		2	1	1	1	5	0	0	0
ImpVal	2012-02-14	11	20	4	0.2	25.789	5.06	1	160	0	0	0	0	160	4	7500	2012-02-07	7	400	400	0	2	0	0	0			1	999	2	0		3	1	88	7	1		2	0	0	0	6	2	1	0
	2012-02-14	45	20	0	0		0	1	155	0	0	0	0	155	5	15000	2011-10-08	129		650	0	2	0	0	0			1	999	2	0		3	1	88	120	1		2	0	0	0	6	1	3	2
Williams	2012-03-07	789	20	1	0.05	0.036	0.036	4	0	65	0	0	0	65	12	67500	2012-02-20	16	750	800	2	2	0	60	1	1	0	1	30	1	0	15	3	0	25	15	5		2	1	1	0	0	0	0	0
	2012-03-07	3	20	1	0.05	0.036	0.036	4	0	35	0	0	0	35	14	22500	2012-01-25	42	650	800	2	2	0	14	1	1	0	1	60	1	0	45	3	0	25	45	5		2	1	1	0	0	0	0	0
ImpVal	2012-03-07	30	20	0	0		0	1	160	0	0	0	0	160	4	7500	2012-02-21	15	400	400	0	2	0	0	0			1		2	0		3	1	88	15	1		2	0	0	0	6	2	1	0
	2012-03-07	31	19	0	0		0	1	155	0	0	0	0	155	9	15000	2011-10-08	151		650	0	2	0	0	0			1		2	0		3	1	88	150	1		2	0	0	0	6	2	4	0
Williams	2012-04-03	W21	19	5	0.263158	1.1204	0.23	4	90	0	0	0	0	90	6	23265	2012-03-15	19	425	450	2	2	0	60	1	1	0	1	21	1	0	15	3	0	30	21	5		4	1	0	1	2	25	12	6
	2012-04-03	W2	21	1	0.047619	21	21	4	0	30	0	0	0	30	11	12000	2011-12-01	124	950	1100	2	2	0	30	1	1	0	1	90	1	0	30	3	0	20	60	5		4	1	1	0	0	0	0	0
ImpVal	2012-04-03	8	20	1	0.05	0.23	0.23	1	0	160	0	0	0	160	4	7500	2012-03-28	6	400	400	0	2	0		0			1	999	2	0		3	1	88	7	1		2	0	0	0	6	2	1	0
	2012-04-03	41	20	8	0.4	0.74525	0.38	1	0	155	0	0	0	155	10	15000	2011-10-08	178		655	0	2	0		0			1	999	2	0		3	1	88	180	1		2	0	0	0	6	2	0	0

## Sheet: Questionnaire
	Date	Lot	# samples	# positive	% pos	Mean MPN	Median MPN of positive samples	Watersource	BeefStrs	Beefhfrs	Beefcows	Dairystrs	Dairyhfrs	Total	Age	sqft	arrivedate	DOF	initwe	currwt	pencover	watercover	pensurface	daysempty	penscraped	pengrrom	timesgroomed	mound	waterclean	howwaterclean	feedbunks	bunkclean	cleanmeth	floorfeed	concperc	conchowlong	conctype	proteinsupp	roughage	ionophore	additive	cattlesource	sourcenumb	casesdiarr	casesresp	died
Williams	2011-09-13	W	19	12	0.631579	72.875	21.5	4	0	0	40	0	0	40	14	20000	2011-09-09	4	1100	1100	2	2	0	90	2		0	1		0	0	4	3	1	40	4	5		3	1	1	1	3	0	0	0
Texas	2011-09-27	A1	20	4	0.2	121.575	27														2	2	0											1			1			0	0
	2011-09-27	A2	20	0	0		0														2	2	0											1			1			0	0
Texas	2011-10-04	B1	20	10	0.5	5.918	4.2														2	2	0											1			1			0	0
	2011-10-04	B2	20	2	0.1	5.518	5.518														2	2	0											1			1			0	0
Texas	2011-10-19	A3	20	4	0.2	38.568	2.118														2	2	0											1			1			0	0
	2011-10-19	A4	20	2	0.1	1.765	1.765														2	2	0											1			1			0	0
Texas	2011-10-25	B3	20	7	0.35	34.9474	0.73														2	2	0											1			1			0	0
	2011-10-25	B4	19	5	0.263158	2.3144	0.3														2	2	0											1			1			0	0
Williams	2011-10-27	A1	21	5	0.238095	48.726	0.3	4	0	25	0	0	0	25	9	23625	2011-09-27	30	875	900	2	2	0	180	1		0	1	999	0	0		0	0	20	20	5		2	1	1	0	0	0	0	0
	2011-10-27	B1	21	10	0.47619	16.2624	0.615	4	0	20	0	0	0	20	8	23625	2011-09-27	30	850	875	2	2	0	180	1		0	1	999	0	0		0	0	20	20	5		2	1	1	0	0	0	0	0
ImpVal	2011-11-03	A1	20	18	0.9	684.331	96.5	2	0	0	80	0	0	80	5	9000	2011-10-06	28	274	340	0	2	0	4	0		3	1	30	2	0		3	1	89	25	1		2	0	0	0	6	999	999	0
	2011-11-03	A2	20	15	0.75	65.6753	9.2	2	155	0	0	0	0	155	12	15000	2011-03-15	233	280	950	0	2	0	4	0		4	1	30	2	0		3	1	89	220	1		2	0	0	0	6	999	999	3
Texas	2011-11-08	A5	20	0	0		0														2	2	0											1			1			0	0
	2011-11-08	A6	20	3	0.15	1.48867	0.23														2	2	0											1			1			0	0
Texas	2011-11-15	B5	20	10	0.5	4.1246	2.3														2	2	0											1			1			0	0
	2011-11-15	B6	20	6	0.3	0.838	0.198														2	2	0											1			1			0	0
Texas	2011-12-06	A7	18	0	0		0														2	2	0											1			1			0	0
	2011-12-06	A8	17	0	0		0														2	2	0											1			1			0	0
Texas	2011-12-06	B7	18	9	0.5	0.812778	0.092														2	2	0											1			1			0	0
	2011-12-06	B8	18	0	0		0														2	2	0											1			1			0	0
ImpVal	2011-12-13	476_20	19	10	0.526316	51.588	0.775	1	0	0	80	80	0	160	7	9000	2011-12-01	12	274	300	0	2	0	4	0		3	1	30	2	0		3	1	89	12	1		2	0	0	0	6	0	1	0
	2011-12-13	487_53	20	10	0.5	69.3582	1.95	1	0	0	80	80	0	160	9	9000	2011-10-06	68	280	400	0	2	0	4	0		3	1	30	2	0		3	1	89	90	1		2	0	0	0	6	0	10	0
Williams	2011-12-13	A2	20	13	0.65	2126.29	3.6	4	0	225	0	0	0	225	6	67500	2011-12-01	12	450	460	2	2	0	150	0		0	1	30	1	0	15	3	1	10	13	5		2	1	1	1	1	0	35	0
	2011-12-13	B2	20	0	0		0	4	0	50	0	0	0	50	13	45000	2011-10-15	59	900	1000	2	2	0	50	0		0	1	999	999	0	15	3	0	30	30	5		4	1	1	0	0	0	0	0
ImpVal	2012-01-18	476_20	20	6	0.3	3500.23	0.15	1	160	0	0	0	0	160	4	10000	2012-01-03	15	284	295	0	2	0		0		1	1	30	2	0		3	1	88	14	1		2	0	0	0	6	5	1	0
	2012-01-18	39_40	20	0	0		0	1	155	0	0	0	0	155		15000			640		0	2	0		0		1	1	30	2	0		3	1	88	150	1		2	0	0	0	6	5	6	3
Williams	2012-01-18	A3	20	0	0		0	4	0	50	0	0	0	50	7	47250	2011-12-02	47	425	525	2	2	0	180	0		0	1	180	1	0		3	1	20	14	5		2	1	1	1	1	0	20	3
	2012-01-18	B3	20	0	0		0	4	0	30	0	0	0	30	13	23625	2011-11-15	64	900	1300	2	2	0	90	1	1	0	1	999	0	0		3	0	40	30	5		2	1	1	0	0	0	0	0
Williams	2012-02-14	A4	20	1	0.05	9.2	9.2	4	10	15	0	0	0	25	7	20000	2012-02-07	7	700	725	2	2	0	120	1	1	0	1	999	0	0	7	3	1	10	7	5		2	1	1	0	0	0	0	0
	2012-02-14	B4	21	1	0.047619	0.73	0.73	4	35	0	0	0	0	35	8	12000	2011-12-10	66	550	750	2	2	0	120	0		0	1	14	2	0	15	3	1	40	10	1		2	1	1	1	5	0	0	0
ImpVal	2012-02-14	11	20	4	0.2	25.789	5.06	1	160	0	0	0	0	160	4	7500	2012-02-07	7	400	400	0	2	0	0	0			1	999	2	0		3	1	88	7	1		2	0	0	0	6	2	1	0
	2012-02-14	45	20	0	0		0	1	155	0	0	0	0	155	5	15000	2011-10-08	129		650	0	2	0	0	0			1	999	2	0		3	1	88	120	1		2	0	0	0	6	1	3	2
Williams	2012-03-07	789	20	1	0.05	0.036	0.036	4	0	65	0	0	0	65	12	67500	2012-02-20	16	750	800	2	2	0	60	1	1	0	1	30	1	0	15	3	0	25	15	5		2	1	1	0	0	0	0	0
	2012-03-07	3	20	1	0.05	0.036	0.036	4	0	35	0	0	0	35	14	22500	2012-01-25	42	650	800	2	2	0	14	1	1	0	1	60	1	0	45	3	0	25	45	5		2	1	1	0	0	0	0	0
ImpVal	2012-03-07	30	20	0	0		0	1	160	0	0	0	0	160	4	7500	2012-02-21	15	400	400	0	2	0	0	0			1		2	0		3	1	88	15	1		2	0	0	0	6	2	1	0
	2012-03-07	31	19	0	0		0	1	155	0	0	0	0	155	9	15000	2011-10-08	151		650	0	2	0	0	0			1		2	0		3	1	88	150	1		2	0	0	0	6	2	4	0
Williams	2012-04-03	W21	19	5	0.263158	1.1204	0.23	4	90	0	0	0	0	90	6	23265	2012-03-15	19	425	450	2	2	0	60	1	1	0	1	21	1	0	15	3	0	30	21	5		4	1	0	1	2	25	12	6
	2012-04-03	W2	21	1	0.047619	21	21	4	0	30	0	0	0	30	11	12000	2011-12-01	124	950	1100	2	2	0	30	1	1	0	1	90	1	0	30	3	0	20	60	5		4	1	1	0	0	0	0	0
ImpVal	2012-04-03	8	20	1	0.05	0.23	0.23	1	0	160	0	0	0	160	4	7500	2012-03-28	6	400	400	0	2	0		0			1	999	2	0		3	1	88	7	1		2	0	0	0	6	2	1	0
	2012-04-03	41	20	8	0.4	0.74525	0.38	1	0	155	0	0	0	155	10	15000	2011-10-08	178		655	0	2	0		0			1	999	2	0		3	1	88	180	1		2	0	0	0	6	2	0	0
Texas	2012-05-22		40	9	0.225	0.5312	0.23														2	2	0											1			1			0	0
	2012-05-22		40	6	0.15	2.48133	0.58														2	2	0											1			1			0	0

## Sheet: Sorted by location, DOF
Williams
	Date	Lot	# samples	# positive	% pos	Mean MPN	Median MPN of positive samples			30 DOF or less						Mean MPN	Median MPN of positive samples	DOF
Williams	2011-09-13	W	19	12	0.631579	72.875	21.5			Williams	40799	W	19	12	0.631579	72.875	21.5	4
Williams	2011-10-27	A1	21	5	0.238095	48.726	0.3			Williams	40843	A1	21	5	0.238095	48.726	0.3	30
	2011-10-27	B1	21	10	0.47619	16.2624	0.615			Williams	40843	B1	21	10	0.47619	16.2624	0.615	30
Williams	2011-12-13	A2	20	13	0.65	2126.29	3.6			ImpVal	40850	A1	20	18	0.9	684.331	96.5	28
	2011-12-13	B2	20	0	0		0			ImpVal	40890	476_20	19	10	0.526316	51.588	0.775	12
Williams	2012-01-18	A3	20	0	0		0			Williams	40890	A2	20	13	0.65	2126.29	3.6	12
	2012-01-18	B3	20	0	0		0			ImpVal	40926	476_20	20	6	0.3	3500.23	0.15	15
Williams	2012-02-14	A4	20	1	0.05	9.2	9.2			Williams	40953	A4	20	1	0.05	9.2	9.2	7
	2012-02-14	B4	21	1	0.047619	0.73	0.73			ImpVal	40953	11	20	4	0.2	25.789	5.06	7
Williams	2012-03-07	789	20	1	0.05	0.036	0.036			Williams	40975	789	20	1	0.05	0.036	0.036	16
	2012-03-07	3	20	1	0.05	0.036	0.036			ImpVal	40975	30	20	0	0		0	15
Williams	2011-04-03	W21	19	5	0.263158	1.1204	0.23			Williams	41002	W21	19	5	0.263158	1.1204	0.23	19
	2011-04-03	W2	21	1	0.047619	21	21			ImpVal	41002	8	20	1	0.05	0.23	0.23	6
		Total	262	50	0.19084							total	259	86	0.332046
Texas	2011-09-27	A1	20	4	0.2	121.575	27
	2011-09-27	A2	20	0	0		0
Texas	2011-10-19	A3	20	4	0.2	38.568	2.118
	2011-10-19	A4	20	2	0.1	1.765	1.765
Texas	2011-11-08	A5	20	0	0		0
	2011-11-08	A6	20	3	0.15	1.48867	0.23			31 DOF or more
Texas	2011-12-06	A7	18	0	0		0			ImpVal	40850	A2	20	15	0.75	65.6753	9.2	233
	2011-12-06	A8	17	0	0		0			ImpVal	40890	487_53	20	10	0.5	69.3582	1.95	68
		Total	155	13	0.083871					Williams	40890	B2	20	0	0		0	59
										Williams	40926	A3	20	0	0		0	47
										Williams	40926	B3	20	0	0		0	64
Texas	2011-10-04	B1	20	10	0.5	5.918	4.2			Williams	40953	B4	21	1	0.047619	0.73	0.73	66
	2011-10-04	B2	20	2	0.1	5.518	5.518			ImpVal	40953	45	20	0	0		0	129
Texas	2011-10-25	B3	20	7	0.35	34.9474	0.73			Williams	40975	3	20	1	0.05	0.036	0.036	42
	2011-10-25	B4	19	5	0.263158	2.3144	0.3			ImpVal	40975	31	19	0	0		0	151
Texas	2011-11-15	B5	20	10	0.5	4.1246	2.3			Williams	41002	W2	21	1	0.047619	21	21	124
	2011-11-15	B6	20	6	0.3	0.838	0.198			ImpVal	41002	41	20	8	0.4	0.74525	0.38	178
Texas	2011-12-06	B7	18	9	0.5	0.812778	0.092						221	36	0.162896
	2011-12-06	B8	18	0	0		0
Texas	2012-05-23	B9	40	9	0.225	0.5312	0.23
	2012-05-23	B10	40	6	0.15	2.48133	0.58
		Total	235	64	0.27234
ImpVal	2011-11-03	A1	20	18	0.9	684.331	96.5
	2011-11-03	A2	20	15	0.75	65.6753	9.2
ImpVal	2011-12-13	476_20	19	10	0.526316	51.588	0.775
	2011-12-13	487_53	20	10	0.5	69.3582	1.95
ImpVal	2012-01-18	476_20	20	6	0.3	3500.23	0.15
	2012-01-18	39_40	20	0	0		0
ImpVal	2012-02-14	11	20	4	0.2	25.789	5.06
	2012-02-14	45	20	0	0		0
ImpVal	2012-03-07	30	20	0	0		0
	2012-03-07	31	19	0	0		0
ImpVal	2011-04-03	8	20	1	0.05	0.23	0.23
	2011-04-03	41	20	8	0.4	0.74525	0.38
		Total	238	72	0.302521
			890

## Sheet: Charts of MPN
Date	% pos	Mean MPN	Median MPN of positive samples	log10 Mean MPN
2011-09-13	0.631579	72.875	21.5	1.86258
2011-09-27	0.2	121.575	27	2.08484
2011-09-27	0					Median MPN (for positive samples only) from each collection
2011-10-04	0.5	5.918	4.2	0.772175
2011-10-04	0.1	5.518	5.518	0.741782
2011-10-19	0.2	38.568	2.118	1.58623
2011-10-19	0.1	1.765	1.765	0.246745
2011-10-25	0.35	34.9474	0.73	1.54342
2011-10-25	0.263158	2.3144	0.3	0.364438
2011-10-27	0.238095	48.726	0.3	1.68776
2011-10-27	0.47619	16.2624	0.615	1.21118
2011-11-03	0.9	684.331	96.5	2.83527
2011-11-03	0.75	65.6753	9.2	1.8174
2011-11-08	0
2011-11-08	0.15	1.48867	0.23	0.172797
2011-11-15	0.5	4.1246	2.3	0.615382
2011-11-15	0.3	0.838	0.198	-0.076756
2011-12-06	0
2011-12-06	0
2011-12-06	0.5	0.812778	0.092	-0.0900282
2011-12-06	0
2011-12-13	0.526316	51.588	0.775	1.71255
2011-12-13	0.5	69.3582	1.95	1.8411
2011-12-13	0.65	2126.29	3.6	3.32762
2011-12-13	0
2012-01-18	0.3	3500.23	0.15	3.5441
2012-01-18	0
2012-01-18	0
2012-01-18	0
2012-02-14	0.05	9.2	9.2	0.963788
2012-02-14	0.047619	0.73	0.73	-0.136677
2012-02-14	0.2	25.789	5.06	1.41143
2012-02-14	0
2012-03-07	0.05	0.036	0.036	-1.4437
2012-03-07	0.05	0.036	0.036	-1.4437
2012-03-07	0
2012-03-07	0
2012-04-03	0.263158	1.1204	0.23	0.0493731
2012-04-03	0.047619	21	21	1.32222
2012-04-03	0.05	0.23	0.23	-0.638272
2012-04-03	0.4	0.74525	0.38	-0.127698
2012-05-22	0.225	0.5312	0.23	-0.274742
2012-05-22	0.15	2.48133	0.58	0.394685
	Date
Williams	2011-09-13	23	20	13	23	6.1	23	700	23	2.3	6.1	23	12
Texas	2011-09-27	430	43	11	2.3
	2011-09-27
Texas	2011-10-04	0.036	0.072	11	0.036	4.2	7.4	23	9.2	0.036	4.2
	2011-10-04	11	0.036
Texas	2011-10-19	4.2	150	0.036	0.036
	2011-10-19	2.8	0.73
Texas	2011-10-25	2.3	0.92	0.036	240	0.73	0.036	0.61
	2011-10-25	7.4	0.036	0.036	0.3	3.8
Williams	2011-10-27	240	2.8	0.3	0.3	0.23
	2011-10-27	7.4	150	0.62	2	0.036	0.036	0.61	1.6	0.23	0.092
ImpVal	2011-11-03	0.73	920	0.92	15	150	240	2300	7	2.1	210	3.7	1.1	43	4.4	430	280	7500	210
	2011-11-03	0.73	2.1	9.2	15	4.2	23	9.2	9.2	1.1	430	4.2	1.4	430	2.8	43
Texas	2011-11-08
	2011-11-08	4.2	0.23	0.036
Texas	2011-11-15	2.3	0.36	0.3	9.2	15	2.3	0.036	4.2	0.15	7.4
	2011-11-15	0.36	0.036	0.36	0.036	0.036	4.2
Texas	2011-12-06
	2011-12-06
Texas	2011-12-06	2.6	0.036	0.036	0.092	0.092	0.073	0.15	0.036	4.2
	2011-12-06
ImpVal	2011-12-13	0.62	2	0.2	23	28	0.15	0.36	460	0.63	0.92
	2011-12-13	93	0.11	1.5	0.036	150	2.4	1.5	430	0.036	15
Williams	2011-12-13	1.1	0.74	0.33	23000	24	0.36	2300	0.092	6.1	3.6	1.1	4.4	2300
	2011-12-13
ImpVal	2012-01-18	0.15	0.96	21000	0.036	0.072	0.15
	2012-01-18
Williams	2012-01-18
	2012-01-18
Williams	2012-02-14	9.2
	2012-02-14	0.73
ImpVal	2012-02-14	9.2	0.92	0.036	93
	2012-02-14
Williams	2012-03-07	0.036
	2012-03-07	0.036
ImpVal	2012-03-07
	2012-03-07
Williams	2011-04-03	1.1	4.2	0.23	0.036	0.036
	2011-04-03	21
ImpVal	2011-04-03	0.23
	2011-04-03	0.38	0.38	0.036	0.62	1.5	2.8	0.036	0.21
Texas	2012-05-23	1.5	0.036	0.74	0.23	0.15
	2012-05-23	0.93	0.092	0.23	0.036	4.4	9.2

## Sheet: Sheet5
					2.86173	4.13347	0.0563025	2.54139	2.12325	1.94716	1.86173	2.36923	3.88021	2.36923	1.36332	1.36332	2.12325	1.86173	1.0563	1.91497	1.29239	3.46848	1.54139	0.676091	2.46379	1.36332	2.46379	0.0563025	0.0563025	1.54139	2.82222	0.861728	1.07978	1.67609	1.46848
					2.80103	3.13347	0.357332	0.0563025	3.67609	1.36332	1.46379	0.0563025	1.94716	3.67609	4.46379	1.82222	0.861728	1.0563	0.0563025	0.0563025	1.80103	0.541393	1.36923	1.48227			1.46379			2.12325			1.07978	0.0563025	0.463788
					2.61394	2.54139	2.54139		0.0563025		0.0563025	0.0563025	0.977121	1.29239	1.46379	2.46379	0.0563025	0.977121	1.0563	0.0563025	0.80103	1.67609	1.01851	5.82222			0.0563025			0.861728			0.0563025	1.36923	0.861728
					2.86173	1.86173	0.0563025		0.0563025		3.88021	0.977121	0.977121	1.80103	2.67609	2.67609		2.46379	0.0563025	0.463788	2.86173	0.0563025	5.86173	0.0563025			3.46848			0.0563025			1.29239	0.861728	0.0563025
					2.28533		2.12325				1.36332	2.07978	0.861728	0.0563025	3.67609	2.12325		2.67609	0.0563025	0.463788	2.94716	3.67609	2.88021	0.357332						0.0563025			1.67609	0.676091	2.14345
					2.86173		2.36923				0.0563025			0.0563025	3.88021	2.86173		1.86173	2.12325	0.363323	0.676091	1.88021	1.0563	0.676091									1.94716		2.46379
					4.3451		2.86173				1.28533			1.28533	4.86173	2.46379		0.0563025		0.676091	1.0563	1.67609	4.86173										0.0563025
					2.86173		2.46379							1.70412	2.3451	2.46379		2.12325		0.0563025	4.16276	4.13347	0.463788										0.822219
					1.86173		0.0563025							0.861728	1.82222	1.54139		0.676091		2.12325	1.29934	0.0563025	2.28533
					2.28533		2.12325							0.463788	3.82222	4.13347		2.36923			1.46379	2.67609	2.0563
					2.86173										2.0682	2.12325							1.54139
					2.57918										1.54139	1.64613							2.14345
															3.13347	4.13347							4.86173
															2.14345	1.94716
															4.13347	3.13347
															3.94716
															5.37506
															3.82222
		Date	Lot
	Williams	2011-09-13	W	A	2.86173	2.80103	2.61394	2.86173	2.28533	2.86173	4.3451	2.86173	1.86173	2.28533	2.86173	2.57918
	Texas	2011-09-27	A1	B	4.13347	3.13347	2.54139	1.86173
	Texas	2011-10-04	B1	C	0.0563025	0.357332	2.54139	0.0563025	2.12325	2.36923	2.86173	2.46379	0.0563025	2.12325
		2011-10-04	B2	D	2.54139	0.0563025
	Texas	2011-10-19	A3	E	2.12325	3.67609	0.0563025	0.0563025
		2011-10-19	A4	F	1.94716	1.36332
	Texas	2011-10-25	B3	G	1.86173	1.46379	0.0563025	3.88021	1.36332	0.0563025	1.28533
		2011-10-25	B4	H	2.36923	0.0563025	0.0563025	0.977121	2.07978
	Williams	2011-10-27	A1	I	3.88021	1.94716	0.977121	0.977121	0.861728
		2011-10-27	B1	J	2.36923	3.67609	1.29239	1.80103	0.0563025	0.0563025	1.28533	1.70412	0.861728	0.463788
	ImpVal	2011-11-03	A1	K	1.36332	4.46379	1.46379	2.67609	3.67609	3.88021	4.86173	2.3451	1.82222	3.82222	2.0682	1.54139	3.13347	2.14345	4.13347	3.94716	5.37506	3.82222
		2011-11-03	A2	L	1.36332	1.82222	2.46379	2.67609	2.12325	2.86173	2.46379	2.46379	1.54139	4.13347	2.12325	1.64613	4.13347	1.94716	3.13347
	Texas	2011-11-08	A6	M	2.12325	0.861728	0.0563025
	Texas	2011-11-15	B5	N	1.86173	1.0563	0.977121	2.46379	2.67609	1.86173	0.0563025	2.12325	0.676091	2.36923
		2011-11-15	B6	O	1.0563	0.0563025	1.0563	0.0563025	0.0563025	2.12325
	Texas	2011-12-06	B7	P	1.91497	0.0563025	0.0563025	0.463788	0.463788	0.363323	0.676091	0.0563025	2.12325
	ImpVal	2011-12-13	476_20	Q	1.29239	1.80103	0.80103	2.86173	2.94716	0.676091	1.0563	4.16276	1.29934	1.46379
		2011-12-13	487_53	R	3.46848	0.541393	1.67609	0.0563025	3.67609	1.88021	1.67609	4.13347	0.0563025	2.67609
	Williams	2011-12-13	A2	S	1.54139	1.36923	1.01851	5.86173	2.88021	1.0563	4.86173	0.463788	2.28533	2.0563	1.54139	2.14345	4.86173
	ImpVal	2012-01-18	476_20	T	0.676091	1.48227	5.82222	0.0563025	0.357332	0.676091
	Williams	2012-02-14	A4	U	2.46379
		2012-02-14	B4	V	1.36332
	ImpVal	2012-02-14	11	W	2.46379	1.46379	0.0563025	3.46848
	Williams	2012-03-07	789	X	0.0563025
		2012-03-07	3	Y	0.0563025
	Williams	2011-04-03	W21	Z	1.54139	2.12325	0.861728	0.0563025	0.0563025
		2011-04-03	W2	AA	2.82222
	ImpVal	2011-04-03	8	BB	0.861728
		2011-04-03	41	CC	1.07978	1.07978	0.0563025	1.29239	1.67609	1.94716	0.0563025	0.822219
	Texas	2012-05-23	B9	DD	1.67609	0.0563025	1.36923	0.861728	0.676091
		2012-05-23	B10	EE	1.46848	0.463788	0.861728	0.0563025	2.14345	2.46379

[truncated: 2 more sheets: Sheet1, Table of stats]
