# Supplementary material for: Understanding the transmission dynamics of Escherichia coli O157:H7 super-shedding infections in feedlot cattle
Source: PeerJ. 2021 Dec 20;9:e12524. doi: 10.7717/peerj.12524 (PMC8697766; doi:10.7717/peerj.12524)
Supplement: Supplemental Information 2 [file peerj-09-12524-s002.xlsx]

## Sheet: Raw MPN Data
Steer ID	Pen number	Date	MPN per Gram	Log MPN		Tissue Culture	Steer ID	Pen Number	Tissue	Date	MPN per Gram	Log MPN
217	1	2012-01-10	3.15316e+06	6.49875			217	1	Jejunum	2012-03-23	0.093156	-1.03079
252	2	2012-01-10	3.15316e+06	6.49875			234	4	Cecum	2012-03-23	40.6683	1.60926
257	3	2012-01-10	11548.7	4.06253			234	4	Spiral Colon	2012-03-23	3.4695	0.540267
234	4	2012-01-10	107199	5.03019			234	4	Rectum	2012-03-23	43.9737	1.64319
215	6	2012-01-10	42.7	1.63043			292	9	Cecum	2012-04-20	0.093156	-1.03079
253	8	2012-01-10	0.87	-0.0604807
267	9	2012-01-10	23	1.36173
							24 HR p.i.	Steer ID	Pen Number	Date	MPN per Gram	Log MPN
217	1	2012-01-12	2.12028e+06	6.32639				292	9	2012-04-07	6967.62	3.84308
252	2	2012-01-12	11388.6	4.05647				294	11	2012-04-07	4.3043e+06	6.6339
257	3	2012-01-12	1468.9	3.16699
234	4	2012-01-12	933	2.96988				285	2	2012-04-14	1.79438e+06	6.25391
225	5	2012-01-12	0.036	-1.4437				275	4	2012-04-14	78.507	1.89491
253	8	2012-01-12	0.036	-1.4437				281	6	2012-04-14	0.226193	-0.645521
								276	8	2012-04-14	0.060001	-1.22184
217	1	2012-01-16	4611.6	3.66385				283	10	2012-04-14	0.036101	-1.44248
252	2	2012-01-16	458.3	2.66115
257	3	2012-01-16	4584.5	3.66129
234	4	2012-01-16	42.7	1.63043
217	1	2012-01-18	93.3	1.96988
252	2	2012-01-18	1098.9	3.04096
257	3	2012-01-18	1098.9	3.04096
234	4	2012-01-18	14.7	1.16732
253	8	2012-01-18	0.114	-0.943095
217	1	2012-01-20	93.3	1.96988
252	2	2012-01-20	462.2	2.66483
257	3	2012-01-20	462.2	2.66483
234	4	2012-01-20	0.785	-0.10513
217	1	2012-01-23	2.1	0.322219
252	2	2012-01-23	6.07	0.783189
234	4	2012-01-23	4.4	0.643453
225	5	2012-01-23	0.44	-0.356547
217	1	2012-01-25	0.785	-0.10513
252	2	2012-01-25	0.427	-0.369572
234	4	2012-01-25	23.98	1.37985
225	5	2012-01-25	0.093	-1.03152
217	1	2012-01-27	932.5	2.96965
252	2	2012-01-27	6.94	0.841359
257	3	2012-01-27	932.8	2.96979
234	4	2012-01-27	9.3	0.968483
217	1	2012-01-30	239.8	2.37985
234	4	2012-01-30	0.204	-0.69037
217	1	2012-02-01	9.32	0.969416
252	2	2012-02-01	0.24	-0.619789
234	4	2012-02-01	0.074	-1.13077
217	1	2012-02-03	0.42	-0.376751
234	4	2012-02-03	0.036	-1.4437
252	2	2012-02-06	2396.7	3.37961
234	4	2012-02-06	42.7	1.63043
217	1	2012-02-08	4.38	0.641474
252	2	2012-02-08	4.22	0.625312
234	4	2012-02-08	92511.1	4.96619
268	5	2012-02-08	7999359	6.90306
212	7	2012-02-08	227815	5.35758
269	11	2012-02-08	0.03	-1.52288
217	1	2012-02-10	42.73	1.63073
252	2	2012-02-10	0.093	-1.03152
234	4	2012-02-10	19783.7	4.29631
268	5	2012-02-10	1395188	6.14463
212	7	2012-02-10	932.5	2.96965
270	9	2012-02-10	0.276	-0.559091
217	1	2012-02-13	0.728	-0.137869
252	2	2012-02-13	0.093	-1.03152
234	4	2012-02-13	427.3	2.63073
268	5	2012-02-13	23707.5	4.37489
212	7	2012-02-13	740.8	2.8697
270	9	2012-02-13	0.036	-1.4437
217	1	2012-02-15	0.11	-0.958607
234	4	2012-02-15	44	1.64345
268	5	2012-02-15	2396.2	3.37952
212	7	2012-02-15	932.8	2.96979
217	1	2012-02-17	9.33	0.969882
252	2	2012-02-17	0.092	-1.03621
234	4	2012-02-17	146.9	2.16702
268	5	2012-02-17	2396.8	3.37963
212	7	2012-02-17	4.27	0.630428
217	1	2012-02-20	4271.5	3.63058
234	4	2012-02-20	226480	5.35503
268	5	2012-02-20	251393	5.40035
217	1	2012-02-22	2396.7	3.37961
234	4	2012-02-22	231.2	2.36399
268	5	2012-02-22	427.3	2.63073
212	7	2012-02-22	0.43	-0.366532
217	1	2012-02-24	932.5	2.96965
234	4	2012-02-24	2397.8	3.37981
268	5	2012-02-24	28.6	1.45637
217	1	2012-02-27	42.7	1.63043
217	1	2012-02-29	34618.2	4.5393
234	4	2012-02-29	0.38	-0.420216
268	5	2012-02-29	2395.8	3.37945
217	1	2012-03-02	0.60713	-0.216718
234	4	2012-03-02	2395.95	3.37948
268	5	2012-03-02	4270	3.63043
217	1	2012-03-05	0.210648	-0.676443
234	4	2012-03-05	93.2796	1.96979
268	5	2012-03-05	0.221364	-0.654893
217	1	2012-03-07	0.072246	-1.14119
234	4	2012-03-07	146.89	2.16699
268	5	2012-03-07	93.2803	1.96979
217	1	2012-03-09	4.27288	0.630721
234	4	2012-03-09	42.7287	1.63072
268	5	2012-03-09	14.6892	1.167
234	4	2012-03-12	0.060019	-1.22171
268	5	2012-03-12	93.2799	1.96979
217	1	2012-03-14	0.03	-1.52288
289	2	2012-03-14	0.794832	-0.0997247
274	3	2012-03-14	0.090016	-1.04568
234	4	2012-03-14	146.892	2.167
286	6	2012-03-14	23871.5	4.37788
280	7	2012-03-14	1.86324	0.270269
291	8	2012-03-14	61188	4.78667
295	9	2012-03-14	23.6356	1.37357
289	2	2012-03-16	15.5503	1.19174
234	4	2012-03-16	114.193	2.05764
268	5	2012-03-16	42.7285	1.63072
286	6	2012-03-16	1.41165	0.149727
280	7	2012-03-16	376640	5.57593
291	8	2012-03-16	1.32252	0.121402
295	9	2012-03-16	0.241667	-0.616783
271	11	2012-03-16	0.124189	-0.905917
217	1	2012-03-19	0.061022	-1.21451
289	2	2012-03-19	3.57109	0.5528
268	5	2012-03-19	0.919176	-0.0366013
286	6	2012-03-19	14614.8	4.16479
280	7	2012-03-19	91336.1	4.96064
291	8	2012-03-19	74.3136	1.87107
217	1	2012-03-21	0.27576	-0.559469
289	2	2012-03-21	125.992	2.10034
274	3	2012-03-21	0.204369	-0.689585
234	4	2012-03-21	9.32803	0.96979
268	5	2012-03-21	23.9789	1.37983
286	6	2012-03-21	0.090286	-1.04438
280	7	2012-03-21	9.44801	0.97534
291	8	2012-03-21	72082.4	4.85783
289	2	2012-03-23	1.50916	0.178736
274	3	2012-03-23	0.379289	-0.42103
234	4	2012-03-23	40.4012	1.60639
268	5	2012-03-23	0.285512	-0.544376
280	7	2012-03-23	43.9737	1.64319
291	8	2012-03-23	14682.2	4.16679
274	3	2012-03-26	0.072246	-1.14119
268	5	2012-03-26	0.522253	-0.282119
280	7	2012-03-26	0.122072	-0.913384
291	8	2012-03-26	9285.41	3.9678
274	3	2012-03-28	0.073567	-1.13332
268	5	2012-03-28	0.423228	-0.373426
280	7	2012-03-28	0.155503	-0.808261
291	8	2012-03-28	0.273298	-0.563364
289	2	2012-03-30	0.501669	-0.299583
268	5	2012-03-30	0.439737	-0.356807
280	7	2012-03-30	0.25864	-0.587304
280	7	2012-04-02	0.315386	-0.501158
280	7	2012-04-04	0.092982	-1.0316
274	3	2012-04-06	0.198855	-0.701463
280	7	2012-04-06	23.9788	1.37983
274	3	2012-04-09	0.093156	-1.03079
268	5	2012-04-09	0.036101	-1.44248
286	6	2012-04-09	0.093156	-1.03079
280	7	2012-04-09	42.7282	1.63072
292	9	2012-04-09	0.604771	-0.218409
294	11	2012-04-09	1.36965e+06	6.13661
274	3	2012-04-11	3.66255	0.563783
268	5	2012-04-11	2.39789	0.37983
280	7	2012-04-11	285.505	2.45561
292	9	2012-04-11	0.109757	-0.959568
294	11	2012-04-11	4264.7	3.62989
274	3	2012-04-13	0.23979	-0.620169
280	7	2012-04-13	7381.57	3.86815
294	11	2012-04-13	427.293	2.63073
285	2	2012-04-16	9323.94	3.9696
274	3	2012-04-16	93.2803	1.96979
275	4	2012-04-16	0.036101	-1.44248
268	5	2012-04-16	7.40741	0.869667
281	6	2012-04-16	0.036101	-1.44248
280	7	2012-04-16	239.789	2.37983
283	10	2012-04-16	2.3979	0.37983
294	11	2012-04-16	0.274777	-0.56102
285	2	2012-04-18	239.789	2.37983
274	3	2012-04-18	0.285512	-0.544376
281	6	2012-04-18	0.143038	-0.844549
280	7	2012-04-18	239.786	2.37982
294	11	2012-04-18	932.557	2.96968
285	2	2012-04-20	5.24383	0.719649
268	5	2012-04-20	0.036101	-1.44248
280	7	2012-04-20	932.779	2.96978
294	11	2012-04-20	0.072246	-1.14119
285	2	2012-04-23	93.2799	1.96979
280	7	2012-04-23	2395.43	3.37938
285	2	2012-04-25	0.198613	-0.701992
280	7	2012-04-25	7403.04	3.86941
285	2	2012-04-27	0.285731	-0.544043
280	7	2012-04-27	427.284	2.63072
280	7	2012-04-30	2396.94	3.37966
285	2	2012-05-02	0.061939	-1.20804
280	7	2012-05-02	42.7282	1.63072
280	7	2012-05-04	9.32803	0.96979
280	7	2012-05-07	93.2803	1.96979
280	7	2012-05-09	0.321529	-0.49278
280	7	2012-05-11	93.2795	1.96979
280	7	2012-05-14	0.382782	-0.417048
280	7	2012-05-18	0.03049	-1.51584

## Sheet: Data in Chart forms
Days p.i.	Date	206-A9 10^2	241-A9 10^4	270-A9 10^6	212-A9 10^8	268-A9 10^10	Days p.i.	267-W1 10^2	243-W1 10^4	225-W1 10^6	257-W1 10^8	217-W1 10^10	Days p.i.	283-#8055 10^2	276-#8055 10^4	281-#8055 10^6	275-#8055 10^8	285-#8055 10^10	Days p.i.	Date	226-14A 10^2	253-14A 10^4	215-14A 10^6	234-14A 10^8	252-14A 10^10	Days p.i.	274-Tx3800 10^2	284-Tx3800 10^4	291-Tx3800 10^6	286-Tx3800 10^8	289-Tx3800 10^10	Days p.i.	Date	271-Tx1686 10^2	295-Tx1686 10^4	280-Tx1686 10^6	292-Tx1686 10^8	294-Tx1686 10^10
1	2012-01-10	0					1	2.86173	0	0	5.56253	7.99875	1						1	2012-01-10	0	1.43952	3.13043	6.53019	7.99875	1						1	2012-01-10
2	2012-01-11						2						2						2	2012-01-11						2						2	2012-01-11
3	2012-01-12	0					3	0	0	0.0563025	4.66699	7.82639	3						3	2012-01-12	0	0.0563025	0	4.46988	5.55647	3						3	2012-01-12
4	2012-01-13						4						4						4	2012-01-13						4						4	2012-01-13
5	2012-01-14						5						5						5	2012-01-14						5						5	2012-01-14
6	2012-01-15						6						6						6	2012-01-15						6						6	2012-01-15
7	2012-01-16	0					7	0	0	0	5.16129	5.16385	7						7	2012-01-16	0	0	0	3.13043	4.16115	7						7	2012-01-16
8	2012-01-17						8						8						8	2012-01-17						8						8	2012-01-17
9	2012-01-18	0					9	0	0	0	4.54096	3.46988	9						9	2012-01-18	0	0.556905	0	2.66732	4.54096	9						9	2012-01-18
10	2012-01-19						10						10						10	2012-01-19						10						10	2012-01-19
11	2012-01-20	0					11	0	0	0	4.16483	3.46988	11						11	2012-01-20	0	0	0	1.39487	4.16483	11						11	2012-01-20
12	2012-01-21						12						12						12	2012-01-21						12						12	2012-01-21
13	2012-01-22						13						13						13	2012-01-22						13						13	2012-01-22
14	2012-01-23	0					14	0	0	1.14345	0	1.82222	14						14	2012-01-23	0	0	0	2.14345	2.28319	14						14	2012-01-23
15	2012-01-24						15						15						15	2012-01-24						15						15	2012-01-24
16	2012-01-25	0					16	0	0	0.468483	0	1.39487	16						16	2012-01-25	0	0	0	2.87985	1.13043	16						16	2012-01-25
17	2012-01-26						17						17						17	2012-01-26						17						17	2012-01-26
18	2012-01-27	0					18	0	0		4.46979	4.46965	18						18	2012-01-27	0	0	0	2.46848	2.34136	18						18	2012-01-27
19	2012-01-28						19						19						19	2012-01-28						19						19	2012-01-28
20	2012-01-29						20						20						20	2012-01-29						20						20	2012-01-29
21	2012-01-30	0					21	0	0		0	3.87985	21						21	2012-01-30	0	0	0	0.80963	0	21						21	2012-01-30
22	2012-01-31						22						22						22	2012-01-31						22						22	2012-01-31
23	2012-02-01						23					2.46942	23						23	2012-02-01				0.369232	0.880211	23						23	2012-02-01
24	2012-02-02						24						24						24	2012-02-02						24						24	2012-02-02
25	2012-02-03						25					1.12325	25						25	2012-02-03				0.0563025	0	25						25	2012-02-03
26	2012-02-04						26						26						26	2012-02-04						26						26	2012-02-04
27	2012-02-05						27						27						27	2012-02-05						27						27	2012-02-05
28	2012-02-06						28					0	28						28	2012-02-06				3.13043	4.87961	28						28	2012-02-06
29	2012-02-07						29						29						29	2012-02-07						29						29	2012-02-07
30	2012-02-08			0	6.85758	8.40306	30					2.14147	30						30	2012-02-08				6.46619	2.12531	30						30	2012-02-08
31	2012-02-09						31						31						31	2012-02-09						31						31	2012-02-09
32	2012-02-10			0.940909	4.46965	7.64463	32					3.13073	32						32	2012-02-10				5.79631	0.468483	32						32	2012-02-10
33	2012-02-11						33						33						33	2012-02-11						33						33	2012-02-11
34	2012-02-12						34						34						34	2012-02-12						34						34	2012-02-12
35	2012-02-13			0.0563025	4.3697	5.87489	35					1.36213	35						35	2012-02-13				4.13073	0.468483	35						35	2012-02-13
36	2012-02-14						36						36						36	2012-02-14						36						36	2012-02-14
37	2012-02-15			0	4.46979	4.87952	37					0.541393	37						37	2012-02-15				3.14345	0	37						37	2012-02-15
38	2012-02-16						38						38						38	2012-02-16						38						38	2012-02-16
39	2012-02-17		0	0	2.13043	4.87963	39					2.46988	39						39	2012-02-17				3.66702	0.463788	39						39	2012-02-17
40	2012-02-18						40						40						40	2012-02-18						40						40	2012-02-18
41	2012-02-19						41						41						41	2012-02-19						41						41	2012-02-19
42	2012-02-20		0	0	0	6.90035	42					5.13058	42						42	2012-02-20				6.85503	0	42						42	2012-02-20
43	2012-02-21						43						43						43	2012-02-21						43						43	2012-02-21
44	2012-02-22		0	0	1.13347	4.13073	44					4.87961	44						44	2012-02-22				3.86399	0	44						44	2012-02-22
45	2012-02-23						45						45						45	2012-02-23						45						45	2012-02-23
46	2012-02-24		0	0	0	2.95637	46					4.46965	46						46	2012-02-24				4.87981	0	46						46	2012-02-24
47	2012-02-25						47						47						47	2012-02-25						47						47	2012-02-25
48	2012-02-26						48						48						48	2012-02-26						48						48	2012-02-26
49	2012-02-27		0		0	0	49					3.13043	49						49	2012-02-27				0	0	49						49	2012-02-27
50	2012-02-28						50						50						50	2012-02-28						50						50	2012-02-28
51	2012-02-29		0		0	4.87945	51					6.0393	51						51	2012-02-29				1.07978	0	51						51	2012-02-29
52	2012-03-01						52						52						52	2012-03-01						52						52	2012-03-01
53	2012-03-02				0	5.13043	53					1.28328	53						53	2012-03-02				4.87948		53						53	2012-03-02
54	2012-03-03						54						54						54	2012-03-03						54						54	2012-03-03
55	2012-03-04						55						55						55	2012-03-04						55						55	2012-03-04
56	2012-03-05				0	0.845107	56					0.823557	56						56	2012-03-05				3.46979		56						56	2012-03-05
57	2012-03-06						57						57						57	2012-03-06						57						57	2012-03-06
58	2012-03-07				0	3.46979	58					0.358814	58						58	2012-03-07				3.66699		58						58	2012-03-07
59	2012-03-08						59						59						59	2012-03-08						59						59	2012-03-08
60	2012-03-09				0	2.667	60					2.13072	60						60	2012-03-09				3.13072		60						60	2012-03-09
61	2012-03-10						61						61						61	2012-03-10						61						61	2012-03-10
62	2012-03-11						62						62						62	2012-03-11						62						62	2012-03-11
63	2012-03-12					3.46979	63					0	63						63	2012-03-12				0.278289		63						63	2012-03-12
64	2012-03-13						64						64						64	2012-03-13						64						64	2012-03-13
65	2012-03-14					0	65					-0.0228787	65						65	2012-03-14				3.667		65	0.45432	0	6.28667	5.87788	1.40028	65	2012-03-14	0	2.87357	1.77027
66	2012-03-15						66						66						66	2012-03-15						66						66	2012-03-15
67	2012-03-16					3.13072	67					0	67						67	2012-03-16				3.55764		67	0	0	1.6214	1.64973	2.69174	67	2012-03-16	0.594083	0.883217	7.07593
68	2012-03-17						68						68						68	2012-03-17						68						68	2012-03-17
69	2012-03-18						69						69						69	2012-03-18						69						69	2012-03-18
70	2012-03-19					1.4634	70					0.285486	70						70	2012-03-19				0		70	0	0	3.37107	5.66479	2.0528	70	2012-03-19	0	0	6.46064
71	2012-03-20						71						71						71	2012-03-20						71						71	2012-03-20
72	2012-03-21					2.87983	72					0.940531	72						72	2012-03-21				2.46979		72	0.810415	0	6.35783	0.45562	3.60034	72	2012-03-21	0	0	2.47534
73	2012-03-22						73						73						73	2012-03-22						73						73	2012-03-22
74	2012-03-23					0.955624	74					0	74						74	2012-03-23				3.10639		74	1.07897	0	5.66679	0	1.67874	74	2012-03-23	0	0	3.14319
75	2012-03-24						75						75						75	2012-03-24						75						75	2012-03-24
76	2012-03-25						76						76						76	2012-03-25						76						76	2012-03-25
77	2012-03-26					1.21788	77						77						77	2012-03-26						77	0.358814	0	5.4678	0	0	77	2012-03-26	0	0	0.586616
78	2012-03-27						78						78						78	2012-03-27						78						78	2012-03-27
79	2012-03-28					1.12657	79						79						79	2012-03-28						79	0.366683	0	0.936636	0	0	79	2012-03-28	0	0	0.691739
80	2012-03-29						80						80						80	2012-03-29						80		0				80	2012-03-29	0	0
81	2012-03-30					1.14319	81						81						81	2012-03-30						81	0		0	0	1.20042	81	2012-03-30			0.912696
82	2012-03-31						82						82						82	2012-03-31						82						82	2012-03-31
83	2012-04-01						83						83						83	2012-04-01						83						83	2012-04-01
84	2012-04-02					0	84						84						84	2012-04-02						84	0		0	0	0	84	2012-04-02			0.998842
85	2012-04-03						85						85						85	2012-04-03						85						85	2012-04-03
86	2012-04-04					0	86						86						86	2012-04-04						86	0		0	0	0	86	2012-04-04			0.468399
87	2012-04-05						87						87						87	2012-04-05						87						87	2012-04-05
88	2012-04-06					0	88						88						88	2012-04-06						88	0.798537		0	0	0	88	2012-04-06			2.87983
89	2012-04-07						89						89						89	2012-04-07						89						89	2012-04-07				5.34308	8.1339
90	2012-04-08						90						90						90	2012-04-08						90						90	2012-04-08
91	2012-04-09					0.0575192	91						91						91	2012-04-09						91	0.469211		0	0.469211	0	91	2012-04-09			3.13715	1.28159	7.63661
92	2012-04-10						92						92						92	2012-04-10						92			0	0	0	92	2012-04-10
93	2012-04-11					1.87983	93						93						93	2012-04-11						93	2.06378					93	2012-04-11			3.95561	0.540432	5.12989
94	2012-04-12						94						94						94	2012-04-12						94						94	2012-04-12
95	2012-04-13					0	95						95						95	2012-04-13						95	0.879831					95	2012-04-13			5.36815	0	4.13073
96	2012-04-14						96						96	0.0575192	0.278158	0.854479	3.39491	7.75391	96	2012-04-14						96						96	2012-04-14
97	2012-04-15						97						97						97	2012-04-15						97						97	2012-04-15
98	2012-04-16					2.36967	98						98	1.87983	0	0.0575192	0.0575192	5.4696	98	2012-04-16						98	3.46979					98	2012-04-16			3.87983	0	0.93898
99	2012-04-17						99						99						99	2012-04-17						99						99	2012-04-17
100	2012-04-18					0	100						100	0	0	0.655451	0	3.87983	100	2012-04-18						100	0.955624					100	2012-04-18			3.87982	0	4.46968
101	2012-04-19						101						101						101	2012-04-19						101						101	2012-04-19
102	2012-04-20					0.0575193	102						102	0	0	0	0	2.21965	102	2012-04-20						102	0					102	2012-04-20			4.46978	0	0.358814
103	2012-04-21						103						103						103	2012-04-21						103						103	2012-04-21
104	2012-04-22						104						104						104	2012-04-22						104						104	2012-04-22
105	2012-04-23						105						105	0	0	0	0	3.46979	105	2012-04-23						105	0					105	2012-04-23			4.87938		0
106	2012-04-24						106						106						106	2012-04-24						106						106	2012-04-24
107	2012-04-25						107						107	0	0	0	0	0.798008	107	2012-04-25						107	0					107	2012-04-25			5.36941		0
108	2012-04-26						108						108						108	2012-04-26						108						108	2012-04-26
109	2012-04-27						109						109	0	0	0	0	0.955957	109	2012-04-27						109	0					109	2012-04-27			4.13072		0
110	2012-04-28						110						110						110	2012-04-28						110						110	2012-04-28
111	2012-04-29						111						111						111	2012-04-29						111						111	2012-04-29
112	2012-04-30						112						112	0	0	0	0	0	112	2012-04-30						112	0					112	2012-04-30			4.87966		0
113	2012-05-01						113						113	0		0	0		113	2012-05-01						113	0					113	2012-05-01
114	2012-05-02						114						114		0			0.291964	114	2012-05-02						114						114	2012-05-02			3.13072		0
115	2012-05-03						115						115						115	2012-05-03						115						115	2012-05-03
116	2012-05-04						116						116		0			0	116	2012-05-04						116						116	2012-05-04			2.46979		0
117	2012-05-05						117						117						117	2012-05-05						117						117	2012-05-05
118	2012-05-06						118						118						118	2012-05-06						118						118	2012-05-06
119	2012-05-07						119						119		0			0	119	2012-05-07						119						119	2012-05-07			3.56979		0
120	2012-05-08						120						120						120	2012-05-08						120						120	2012-05-08
121	2012-05-09						121						121		0			0	121	2012-05-09						121						121	2012-05-09			1.10722		0
122	2012-05-10						122						122		0				122	2012-05-10						122						122	2012-05-10					0
123	2012-05-11						123						123					0	123	2012-05-11						123						123	2012-05-11			3.56979
124	2012-05-12						124						124						124	2012-05-12						124						124	2012-05-12
125	2012-05-13						125						125						125	2012-05-13						125						125	2012-05-13
126	2012-05-14						126						126					0	126	2012-05-14						126						126	2012-05-14			1.18295
127	2012-05-15						127						127						127	2012-05-15						127						127	2012-05-15
128	2012-05-16						128						128					0	128	2012-05-16						128						128	2012-05-16			0
129	2012-05-17						129						129						129	2012-05-17						129						129	2012-05-17
130	2012-05-18						130						130						130	2012-05-18						130						130	2012-05-18			0.0841574
131	2012-05-19						131						131						131	2012-05-19						131						131	2012-05-19
132	2012-05-20						132						132						132	2012-05-20						132						132	2012-05-20
133	2012-05-21						133						133						133	2012-05-21						133						133	2012-05-21			0
134	2012-05-22						134						134						134	2012-05-22						134						134	2012-05-22
135	2012-05-23						135						135						135	2012-05-23						135						135	2012-05-23			0
136	2012-05-24						136						136						136	2012-05-24						136						136	2012-05-24			0
	Euthanized

## Sheet: Normal Shedder Charts
Days p.i.	10^2	10^4	10⁶	10⁸	10¹⁰
1	0	0	0	10.4087	11.9736
2
3	0		4.39685	8.0208	11.2151
4		0
5
6		0	3.51236	7.92085	9.44539
7	0
8		0	0	8.02094	8.45002
9	0
10			0	5.68158	8.45013
11	0	0
12
13		0	0	0	10.4709
14	0
15			0	4.68463	7.70123
16	0
17			0	0	6.52687
18	0
19
20				0	0
21	0
22				0	8.44995
23
24				0	8.70093
25
26
27				0	4.41562
28
29				0	7.04029
30
31				0	6.2375
32
33
34					7.04029
35
36					0
37
38					6.70122
39
40
41					5.0339
42
43					6.45033
44
45					4.52614
46
47
48					4.78839
49
50					4.69708
51
52					4.7137
53
54
55					0
56
57					0
58
59					0
60
61
62					3.62812
63
64					5.45033
65
66					0
67
68
69					5.94017
70
71					0
72
73					3.62812
74
75
76
77
78
79
80
Days p.i.	10^2	10^4	10⁶	10⁸	10¹⁰
1	6.36659	0	0	9.07946	11.5012
2
3	0	0	3.56619	8.18392	10.3294
4
5
6
7	0	0	0	8.67822	8.66634
8
9	0	0	0	8.05789	6.97237
10
11	0	0	0	7.68176	6.97237
12
13
14	0	0	4.65323	0	5.32471
15
16	0	0	3.9783	0	4.89737
17
18	0	0		7.98672	7.97214
19
20
21	0	0		0	7.38234
22
23					5.97191
24
25					4.62575
26
27
28					0
29
30					5.64397
31
32					6.63322
33
34
35					4.86463
36
37					4.04392
38
39					5.97237
40
41
42					8.63307
43
44					8.3821
45
46					7.97214
47
48
49					6.63292
50
51					9.54179
52
53					4.78578
54
55
56					4.32607
57
58					3.86136
59
60					5.63321
61
62
63					0
64
65					3.47976
66
67					0
68
69
70					3.78805
71
72					4.44304
73
74					0
75
Days p.i.	10²	10^4	10⁶	10⁸	10¹⁰
1	3.66812	3.78072	4.38083	6.90468	11.2848
2
3	5.49034	0	3.58396	3.56741	9.0005
4
5	0	0	4.18181	0	7.41073
6
7	0	0	0	0	5.75055
8
9
10	0	0	0	0	7.00069
11
12	0	0	0	0	4.32893
13
14	0	0	0	0	4.48687
15
16
17	0	0	0	0	0
18	0		0	0
19		0			3.82293
20
21		0			0
22
23
24		0			0
25
26		0			0
27		0
28					0
29
30
31					0
32
33					0

## Sheet: High Shedder Strain Charts
Days p.i.	10^2	10⁴	10^6	10⁸	10¹⁰
1	0	4.95404	6.64495	10.0375	11.5181
2
3	0	3.57094	0	7.9772	9.07579
4
5
6
7	0	0	0	6.63775	7.68047
8
9	0	4.07146	0	6.17464	8.06028
10
11	0	0	0	4.9022	7.68415
12
13
14	0	0	0	5.65077	5.80251
15
16	0	0	0	6.38717	4.64976
17
18	0	0	0	5.9758	5.86068
19
20
21	0	0	0	4.31697	0
22
23				3.87661	4.39955
24
25				3.56374	0
26
27
28				6.63775	6.64975
29
30				9.97351	5.64464
31
32				9.30363	3.98785
33
34
35				7.63805	3.98785
36
37				6.65077	0
38
39				7.17434	3.98316
40
41
42				10.3624	0
43
44				7.37131	0
45
46				8.38713	0
47
48
49				0	0
50
51				4.58712	0
52
53				8.3868
54
55
56				6.97711
57
58				7.17431
59
60				6.63804
61
62
63				3.78568
64
65				7.17432
66
67				7.06496
68
69
70				0
71
72				5.97711
73
74				6.61372
75
Days p.i.	10²	10^4	10⁶	10⁸	10¹⁰
1	4.03517	0	9.84003	9.38274	4.88526
2
3	0	0	5.17477	5.15459	6.17672
4
5
6	0	0	6.92443	9.16965	5.53778
7
8	4.39124	0	9.9112	3.96053	7.08532
9
10	4.65979	0	9.22016	0	5.16372
11
12
13	3.93967	0	9.02117	0	0
14
15	3.94754	0	4.49002	0	0
16		0
17	0		0	0	4.6854
18
19
20	0		0	0	0
21
22	0		0	0	0
23
24	4.37936		0	0	0
25
26
27	4.05006		0	3.97412	0
28			0	0	0
29	5.64459
30
31	4.46065
32
33
34	7.0506
35
36	4.53644
37
38	0
39
40
41	0
42
43	0
44
45	0
46
47
48	0
49	0
50
Days p.i.	10²	10⁴	10⁶	10⁸	10¹⁰
1	0	6.41585	5.2966	8.90293	11.7044
2
3	4.0739	4.42551	10.6023	4.84144	11.2071
4
5				4.10031	8.70039
6	0	0	9.98697
7				0	7.70123
8	0	0	6.00167
9
10	0	0	6.66952	0	4.50949
11
12				0	8.04018
13	0	0	4.11298
14				0	3.92936
15	0	0	4.21809
16	0	0
17			4.43904		0
18
19					0
20			4.52518
21					0
22			3.99477
23
24			6.40616		0
25
26					0
27			6.65704
28					0
29			7.48194
30
31			8.89448		0
32
33					0
34			7.40616		0
35
36			7.40615
37
38			7.99611
39
40
41			8.40571
42
43			8.89574
44
45			7.65705
46
47
48			8.40599
49
50			6.65704
51
52			5.99612
53
54
55			6.99612
56
57			4.53356
58
59			6.99612
60
61
62			4.60929
63
64			0
65
66			3.51062
67
68
69			0
70
71			0
72			0

## Sheet: Dose vs. Time Graphs
Days p.i.	206-A9 10^2	267-W1 10^2	283-#8055 10^2	226-14A 10^2	274-Tx3800 10^2	271-Tx1686 10^2
1	0	6.36659	3.66812	0	4.03517	0
2
3	0	0	5.49034	0	0	4.0739
4
5			0
6					0	0
7	0	0	0	0
8					4.39124	0
9	0	0		0
10			0		4.65979	0
11	0	0		0
12			0
13					3.93967	0
14	0	0	0	0
15					3.94754	0
16	0	0		0		0
17			0		0
18	0	0	0	0
19
20					0
21	0	0		0
22					0
23
24					4.37936
25
26
27					4.05006
28
29					5.64459
30
31					4.46065
32
33
34					7.0506
35
36					4.53644
37
38					0
39
40
41					0
42
43					0
44
45					0
46
47
48					0
49					0
50
Days p.i.	241-A9 10^4	243-W1 10^4	276-#8055 10^4	253-14A 10^4	284-Tx3800 10^4	295-Tx1686 10^4
1	0	0	3.78072	4.95404	0	6.41585
2
3		0	0	3.57094	0	4.42551
4	0
5			0
6	0				0	0
7		0	0	0
8	0				0	0
9		0		4.07146
10			0		0	0
11	0	0		0
12			0
13	0				0	0
14		0	0	0
15					0	0
16		0		0	0	0
17			0
18		0		0
19			0
20
21		0	0	0
22
23
24			0
25
26			0
27			0
28
Days p.i.	270-A9 10^6	225-W1 10^6	281-#8055 10^6	215-14A 10^6	291-Tx3800 10^6	280-Tx1686 10^6
1	0	0	4.38083	6.64495	9.84003	5.2966
2
3	4.39685	3.56619	3.58396	0	5.17477	10.6023
4
5			4.18181
6	3.51236				6.92443	9.98697
7		0	0	0
8	0				9.9112	6.00167
9		0		0
10	0		0		9.22016	6.66952
11		0		0
12			0
13	0				9.02117	4.11298
14		4.65323	0	0
15	0				4.49002	4.21809
16		3.9783		0
17	0		0		0	4.43904
18			0	0
19
20					0	4.52518
21				0
22					0	3.99477
23
24					0	6.40616
25
26
27					0	6.65704
28					0
29						7.48194
30
31						8.89448
32
33
34						7.40616
35
36						7.40615
37
38						7.99611
39
40
41						8.40571
42
43						8.89574
44
45						7.65705
46
47
48						8.40599
49
50						6.65704
51
52						5.99612
53
54
55						6.99612
56
57						4.53356
58
59						6.99612
60
61
62						4.60929
63
64						0
65
66						3.51062
67
68
69						0
70
71						0
72						0
Days p.i.	212-A9 10^8	257-W1 10^8	275-#8055 10^8	234-14A 10^8	286-Tx3800 10^8	292-Tx1686 10^8
1	10.4087	9.07946	6.90468	10.0375	9.38274	8.90293
2
3	8.0208	8.18392	3.56741	7.9772	5.15459	4.84144
4
5			0			4.10031
6	7.92085				9.16965
7		8.67822	0	6.63775		0
8	8.02094				3.96053
9		8.05789		6.17464
10	5.68158		0		0	0
11		7.68176		4.9022
12			0			0
13	0				0
14		0	0	5.65077		0
15	4.68463				0
16		0		6.38717
17	0		0		0
18		7.98672	0	5.9758
19
20	0				0
21		0		4.31697
22	0				0
23				3.87661
24	0				0
25				3.56374
26
27	0				3.97412
28				6.63775	0
29	0
30				9.97351
31	0
32				9.30363
33
34
35				7.63805
36
37				6.65077
38
39				7.17434
40
41
42				10.3624
43
44				7.37131
45
46				8.38713
47
48
49				0
50
51				4.58712
52
53				8.3868
54
55
56				6.97711
57
58				7.17431
59
60				6.63804
61
62
63				3.78568
64
65				7.17432
66
67				7.06496
68
69
70				0
71
72				5.97711
73
74				6.61372
75
Days p.i.	268-A9 10^10	217-W1 10^10	285-#8055 10^10	252-14A 10^10	289-Tx3800 10^10	294-Tx1686 10^10
1	11.9736	11.5012	11.2848	11.5181	4.88526	11.7044
2
3	11.2151	10.3294	9.0005	9.07579	6.17672	11.2071
4
5			7.41073			8.70039
6	9.44539				5.53778
7		8.66634	5.75055	7.68047		7.70123
8	8.45002				7.08532
9		6.97237		8.06028
10	8.45013		7.00069		5.16372	4.50949
11		6.97237		7.68415
12			4.32893			8.04018
13	10.4709				0
14		5.32471	4.48687	5.80251		3.92936
15	7.70123				0
16		4.89737		4.64976
17	6.52687		0		4.6854	0
18		7.97214		5.86068
19			3.82293			0
20	0				0
21		7.38234	0	0		0
22	8.44995				0
23		5.97191		4.39955
24	8.70093		0		0	0
25		4.62575		0
26			0			0
27	4.41562				0
28		0	0	6.64975	0	0
29	7.04029
30		5.64397		5.64464
31	6.2375		0			0
32		6.63322		3.98785
33			0			0
34	7.04029					0
35		4.86463		3.98785
36	0
37		4.04392		0
38	6.70122
39		5.97237		3.98316
40
41	5.0339
42		8.63307		0
43	6.45033
44		8.3821		0
45	4.52614
46		7.97214		0
47
48	4.78839
49		6.63292		0
50	4.69708
51		9.54179		0
52	4.7137
53		4.78578
54
55	0
56		4.32607
57	0
58		3.86136
59	0
60		5.63321
61
62	3.62812
63		0
64	5.45033
65		3.47976
66	0
67		0
68
69	5.94017
70		3.78805
71	0
72		4.44304
73	3.62812
74		0
75

## Sheet: Tissue MPN Graphs
Steer ID	Pen Number	Tissue	Date	MPN per Gram	Log MPN
217	1	Jejunum	2012-03-23	0.093156	0.0386821
234	4	Cecum	2012-03-23	40.6683	1.61981
234	4	Spiral Colon	2012-03-23	3.4695	0.650259
234	4	Rectum	2012-03-23	43.9737	1.65296
292	9	Cecum	2012-04-20	0.093156	0.0386821
Tissue	W1 at 10¹⁰	14A 10⁸	Tx1686 10⁸
Jejunum	0.0386821	0	0
Cecum	0	1.61981	0.0386821
Spiral Colon	0	0.650259	0
Rectum	0	1.65296	0

## Sheet: Virulence
Strain ID	Location (State) collected		Date Collected	Type of shedding	Concentrations in feces (MPN/g)		Toxins
A9	TX		2011-09-27	Normal	43		Stx 2
W1	CA		2011-09-13	Normal	23		Stx 1 and Stx 2
8055	CA		2012-03-21	Normal	2.42		Stx 2
14A	CA		2012-01-18	Super	2.1 x 10⁴		Stx 1 and Stx 2
Tx 3800	TX		2012-01-27	Super	3.9 x 10⁵		Stx 2
Tx 1686	TX		2012-01-27	Super	4.7 x 10⁴		Stx 2
