# Supplementary material for: Understanding the transmission dynamics of Escherichia coli O157:H7 super-shedding infections in feedlot cattle
Source: PeerJ. 2021 Dec 20;9:e12524. doi: 10.7717/peerj.12524 (PMC8697766; doi:10.7717/peerj.12524)
Supplement: Supplemental Information 3 [file peerj-09-12524-s003.xlsx]

## Sheet: MPN data
Steer ID	Pen number	Date	MPN per Gram	Log MPN							217	257	225	243	267	252	234	215	253	226	268	212	270	241	206			217	257	225	243	267	252	234	215	253	226	268	212	270	241	206		Calf #	Strain	Dose	Day inoculated	Pen number
217	1	2012-01-10	3.15316e+06	6.49875					days PI	Date	W1 10^10	W1 10^8	W1 10^6	W1 10^4	W1 10^2	14A 10^10	14A 10^8	14A 10^6	14A 10^4	14A 10^2	A9 10^10	A9 10^8	A9 10^6	A9 10^4	A9 10^2		days PI	W1 10^10	W1 10^8	W1 10^6	W1 10^4	W1 10^2	14A 10^10	14A 10^8	14A 10^6	14A 10^4	14A 10^2	A9 10^10	A9 10^8	A9 10^6	A9 10^4	A9 10^2		217	W1	10	2012-01-09	1
252	2	2012-01-10	3.15316e+06	6.49875					1	2012-01-10	6.49875	4.06253			1.36173	6.49875	5.03019	1.63043	-0.0604807		6.90306	5.35758					1	7.99875	5.56253			2.86173	7.99875	6.53019	3.13043	1.43952		8.40306	6.85758					252	14A	10	2012-01-09	2
257	3	2012-01-10	11548.7	4.06253					3	2012-01-12	6.32639	3.16699	-1.4437			4.05647	2.96988		-1.4437		6.14463	2.96965	-0.559091				3	7.82639	4.66699	0.0563025			5.55647	4.46988		0.0563025		7.64463	4.46965	0.940909				257	W1	8	2012-01-09	3
234	4	2012-01-10	107199	5.03019					6												4.37489	2.8697	-1.4437				6	6.49512	4.91414	0.0281513			4.85881	3.80015		0.0281513		5.87489	4.3697	0.0563025				234	14A	8	2012-01-09	4
215	6	2012-01-10	42.7	1.63043					7	2012-01-16	3.66385	3.66129				2.66115	1.63043										7	5.16385	5.16129	0			4.16115	3.13043		0		5.3772	4.41974					225	W1	6	2012-01-09	5
253	8	2012-01-10	0.87	-0.0604807					8												3.37952	2.96979					8	4.31687	4.85113	0			4.35105	2.89887		0.278452		4.87952	4.46979					215	14A	6	2012-01-09	6
267	9	2012-01-10	23	1.36173					9	2012-01-18	1.96988	3.04096				3.04096	1.16732		-0.943095								9	3.46988	4.54096	0			4.54096	2.66732		0.556905		4.87958	3.30011					243	W1	4	2012-01-09	7
									10												3.37963	0.630428					10	3.46988	4.35289	0			4.35289	2.03109				4.87963	2.13043					253	14A	4	2012-01-09	8
217	1	2012-01-12	2.12028e+06	6.32639					11	2012-01-20	1.96988	2.66483				2.66483	-0.10513										11	3.46988	4.16483	0			4.16483	1.39487				5.88999	1.06521					267	W1	2	2012-01-09	9
252	2	2012-01-12	11388.6	4.05647					13												5.40035						13	2.64605	2.08241	0.571726			3.22401	1.76916				6.90035	0					226	14A	2	2012-01-09	10
257	3	2012-01-12	1468.9	3.16699					14	2012-01-23	0.322219		-0.356547			0.783189	0.643453										14	1.82222	0	1.14345			2.28319	2.14345				5.51554	0.566734					206	A9	2	2012-01-09	11
234	4	2012-01-12	933	2.96988					15												2.63073	-0.366532					15	1.60854	0	0.805968			1.70681	2.51165				4.13073	1.13347					269	A9	4	2012-02-07	11
225	5	2012-01-12	0.036	-1.4437					16	2012-01-25	-0.10513		-1.03152			-0.369572	1.37985										16	1.39487	0	0.468483			1.13043	2.87985				3.54355						270	A9	6	2012-02-07	9
253	8	2012-01-12	0.036	-1.4437					17												1.45637						17	2.93226	2.23489				1.73589	2.67417				2.95637						212	A9	8	2012-02-07	7
									18	2012-01-27	2.96965	2.96979				0.841359	0.968483										18	4.46965	4.46979				2.34136	2.46848				1.47818						268	A9	10	2012-02-07	5
217	1	2012-01-16	4611.6	3.66385					20																		20	4.17475					1.17068	1.23424				0						241	A9	4	2012-02-16	11
252	2	2012-01-16	458.3	2.66115					21	2012-01-30	2.37985																21	3.87985					0	0				2.43973						289	T3800	10	2012-03-13	2
257	3	2012-01-16	4584.5	3.66129					22												3.37945						22	3.17463					0.440106	0.184616				4.87945						274	T3800	2	2012-03-13	3
234	4	2012-01-16	42.7	1.63043					23	2012-02-01	0.969416					-0.619789	-1.13077										23	2.46942					0.880211	0.369232				5.00494						286	T3800	8	2012-03-13	6
									24												3.63043						24	1.79633					0.440106	0.212767				5.13043						280	t1686	6	2012-03-13	7
217	1	2012-01-18	93.3	1.96988					25	2012-02-03	-0.376751						-1.4437										25	1.12325					0	0.0563025				2.98777						291	T3800	6	2012-03-13	8
252	2	2012-01-18	1098.9	3.04096					27												-0.654893						27	0.561625					2.43981	1.59337				0.845107						295	t1686	4	2012-03-13	9
257	3	2012-01-18	1098.9	3.04096					28	2012-02-06						3.37961	1.63043										28	0					4.87961	3.13043				2.15745						284	T3800	4	2012-03-13	10
234	4	2012-01-18	14.7	1.16732					29												1.96979						29	1.07074					3.50246	4.79831				3.46979						271	t1686	2	2012-03-13	11
253	8	2012-01-18	0.114	-0.943095					30	2012-02-08	0.641474					0.625312	4.96619										30	2.14147					2.12531	6.46619				3.06839
									31												1.167						31	2.6361					1.2969	6.13125				2.667
217	1	2012-01-20	93.3	1.96988					32	2012-02-10	1.63073					-1.03152	4.29631										32	3.13073					0.468483	5.79631
252	2	2012-01-20	462.2	2.66483					35	2012-02-13	-0.137869					-1.03152	2.63073										35	1.36213					0.468483	4.13073
257	3	2012-01-20	462.2	2.66483					37	2012-02-15	-0.958607						1.64345										37	0.541393					0.466135	3.14345
234	4	2012-01-20	0.785	-0.10513					39	2012-02-17	0.969882					-1.03621	2.16702										39	2.46988					0.463788	3.66702
									42	2012-02-20	3.63058						5.35503										42	5.13058						6.85503
217	1	2012-01-23	2.1	0.322219					44	2012-02-22	3.37961						2.36399										44	4.87961						3.86399
252	2	2012-01-23	6.07	0.783189					46	2012-02-24	2.96965						3.37981										46	4.46965						4.87981
234	4	2012-01-23	4.4	0.643453					49	2012-02-27	1.63043																49	3.13043						2.9798
225	5	2012-01-23	0.44	-0.356547					51	2012-02-29	4.5393						-0.420216										51	6.0393						1.07978							s
									53	2012-03-02	-0.216718						3.37948										53	1.28328						4.87948
217	1	2012-01-25	0.785	-0.10513					56	2012-03-05	-0.676443						1.96979										56	0.823557						3.46979
252	2	2012-01-25	0.427	-0.369572					58	2012-03-07	-1.14119						2.16699										58	0.358814						3.66699
234	4	2012-01-25	23.98	1.37985					60	2012-03-09	0.630721						1.63072										60	2.13072						3.13072
225	5	2012-01-25	0.093	-1.03152
217	1	2012-01-27	932.5	2.96965
252	2	2012-01-27	6.94	0.841359
257	3	2012-01-27	932.8	2.96979
234	4	2012-01-27	9.3	0.968483
217	1	2012-01-30	239.8	2.37985
234	4	2012-01-30	0.204	-0.69037
217	1	2012-02-01	9.32	0.969416
252	2	2012-02-01	0.24	-0.619789
234	4	2012-02-01	0.074	-1.13077
217	1	2012-02-03	0.42	-0.376751
234	4	2012-02-03	0.036	-1.4437
252	2	2012-02-06	2396.7	3.37961
234	4	2012-02-06	42.7	1.63043
217	1	2012-02-08	4.38	0.641474
252	2	2012-02-08	4.22	0.625312
234	4	2012-02-08	92511.1	4.96619
268	5	2012-02-08	7999359	6.90306
212	7	2012-02-08	227815	5.35758
269	11	2012-02-08	0.03	-1.52288
217	1	2012-02-10	42.73	1.63073
252	2	2012-02-10	0.093	-1.03152
234	4	2012-02-10	19783.7	4.29631
268	5	2012-02-10	1395188	6.14463
212	7	2012-02-10	932.5	2.96965
270	9	2012-02-10	0.276	-0.559091
217	1	2012-02-13	0.728	-0.137869
252	2	2012-02-13	0.093	-1.03152
234	4	2012-02-13	427.3	2.63073
268	5	2012-02-13	23707.5	4.37489
212	7	2012-02-13	740.8	2.8697
270	9	2012-02-13	0.036	-1.4437
217	1	2012-02-15	0.11	-0.958607
234	4	2012-02-15	44	1.64345
268	5	2012-02-15	2396.2	3.37952
212	7	2012-02-15	932.8	2.96979
217	1	2012-02-17	9.33	0.969882
252	2	2012-02-17	0.092	-1.03621
234	4	2012-02-17	146.9	2.16702
268	5	2012-02-17	2396.8	3.37963
212	7	2012-02-17	4.27	0.630428
217	1	2012-02-20	4271.5	3.63058
234	4	2012-02-20	226480	5.35503
268	5	2012-02-20	251393	5.40035
217	1	2012-02-22	2396.7	3.37961
234	4	2012-02-22	231.2	2.36399
268	5	2012-02-22	427.3	2.63073
212	7	2012-02-22	0.43	-0.366532
217	1	2012-02-24	932.5	2.96965
234	4	2012-02-24	2397.8	3.37981
268	5	2012-02-24	28.6	1.45637
217	1	2012-02-27	42.7	1.63043
217	1	2012-02-29	34618.2	4.5393
234	4	2012-02-29	0.38	-0.420216
268	5	2012-02-29	2395.8	3.37945
217	1	2012-03-02	0.60713	-0.216718
234	4	2012-03-02	2395.95	3.37948
268	5	2012-03-02	4270	3.63043
217	1	2012-03-05	0.210648	-0.676443
234	4	2012-03-05	93.2796	1.96979
268	5	2012-03-05	0.221364	-0.654893
217	1	2012-03-07	0.072246	-1.14119
234	4	2012-03-07	146.89	2.16699
268	5	2012-03-07	93.2803	1.96979
217	1	2012-03-09	4.27288	0.630721
234	4	2012-03-09	42.7287	1.63072
268	5	2012-03-09	14.6892	1.167
[truncated: 2 more columns]

## Sheet: Calf info
Calf #	Strain	Dose	Day inoculated	Pen number		Date killed			Days from infection to euthanasia
217	W1	10	2012-01-09	1		2012-03-23			74
252	14A	10	2012-01-09	2		2012-02-29			51
257	W1	8	2012-01-09	3		2012-01-30			21
234	14A	8	2012-01-09	4		2012-03-23			74
225	W1	6	2012-01-09	5		2012-01-25			16
215	14A	6	2012-01-09	6		2012-01-30			21
243	W1	4	2012-01-09	7		2012-01-30			21
253	14A	4	2012-01-09	8		2012-01-30			21
267	W1	2	2012-01-09	9		2012-01-30			21
226	14A	2	2012-01-09	10		2012-01-30			21
206	A9	2	2012-01-09	11		2012-01-30			21
269	A9	4	2012-02-07	11		2012-02-10			3
270	A9	6	2012-02-07	9		2012-02-24			17
212	A9	8	2012-02-07	7		2012-03-09			31
268	A9	10	2012-02-07	5		2012-04-20			73
241	A9	4	2012-02-16	11		2012-02-29			13
289	T3800	10	2012-03-13	2		2012-04-10			28
274	T3800	2	2012-03-13	3
286	T3800	8	2012-03-13	6		2012-04-10			28
280	t1686	6	2012-03-13	7
291	T3800	6	2012-03-13	8		2012-04-10			28
295	t1686	4	2012-03-13	9		2012-03-29			16
284	T3800	4	2012-03-13	10		2012-03-29			16
271	t1686	2	2012-03-13	11		2012-03-29			16
292	t1686	8	2012-04-06	9
294	t1686	10	2012-04-06	11
285	8055	10	2012-04-13	2		2012-05-16			33
275	8055	8	2012-04-13	4
281	8055	6	2012-04-13	6
276	8055	4	2012-04-13	8
283	8055	2	2012-04-13	10
