# Supplementary material for: Understanding the transmission dynamics of Escherichia coli O157:H7 super-shedding infections in feedlot cattle
Source: PeerJ. 2021 Dec 20;9:e12524. doi: 10.7717/peerj.12524 (PMC8697766; doi:10.7717/peerj.12524)
Supplement: Supplemental Information 4 [file peerj-09-12524-s004.xlsx]

## Sheet: Crypt lengths
Prox. Col
Type of Sheddter				Strain ID			Dose of Inoculum							Type of Sheddter				Strain ID			Dose of Inoculum
						10^2	10^4	10^6	10^8	10^10										10^2	10^4	10^6	10^8	10^10
				A9		91.2	94	98.2	105.3	101.3								A9		0	0	(1/8)	(6/14)	(25/32)
	Normal			W1		97.4	96.3	90.9	94.6	85.2					Normal			W1		0	0	(2/7)	(6/9)	(25/32)
				8055		103.3	95.5	103.7	92.5	96.6								8055		(1/9)	0	(2/9)	(1/9)	(7/15)
				14A		102.7	93.6	87.1	99	91.7								14A		0	(2/9)	0	(27/32)	(14/22)
	Super			TX 3800		99.5	97	90.6	94.9	99.7					Super			TX 3800		(11/22)	0	(7/13)	(5/13)	(6/13)
				TX 1686		101	104.1	99.4	98.4	91.4								TX 1686		(1/8)	(2/8)	(27/32)	(3/7)	(6/16)
	Negative contol= 93.6
Distal col.
Type of Sheddter				Strain ID			Dose of Inoculum
						10^2	10^4	10^6	10^8	10^10
				A9		97.2	93.8	96.8	93.6	96
	Normal			W1		102.2	90.2	87.2	96.8	94.2
				8055		98.7	92.3	102.8	94.4	98
				14A		96.9	102.6	88.1	100.3	95
	Super			TX 3800		102.3	95	100.1	101.7	97.4
				TX 1686		98.3	88.4	97.3	100.1	92
	Negative contol= 89.3
